# Supplementary material for: Prospective meta-analysis protocol on randomised trials of renin–angiotensin system inhibitors in patients with COVID-19: an initiative of the International Society of Hypertension
Source: PubMed Central journal article supplement — BMJ Open. 2021 Feb 16;11(2):e043625. doi: 10.1136/bmjopen-2020-043625 (PMC7887864; doi:10.1136/bmjopen-2020-043625), 2021-02-16
Supplement: bmjopen-2020-043625.draft_revisions.pdf [file bmjopen-2020-043625.draft_revisions.pdf]

# BMJ Open

BMJ Open is committed to open peer review. As part of this commitment we make the peer review history of every article we publish publicly available.

When an article is published we post the peer reviewers' comments and the authors' responses online. We also post the versions of the paper that were used during peer review. These are the versions that the peer review comments apply to.

The versions of the paper that follow are the versions that were submitted during the peer review process. They are not the versions of record or the final published versions. They should not be cited or distributed as the published version of this manuscript.

BMJ Open is an open access journal and the full, final, typeset and author-corrected version of record of the manuscript is available on our site with no access controls, subscription charges or pay-per-view fees (<http://bmjopen.bmj.com>).

If you have any questions on BMJ Open's open peer review process please email [info.bmjopen@bmj.com](mailto:info.bmjopen@bmj.com)

# BMJ Open

## A Prospective Meta-Analysis Protocol on Randomised Trials of Renin-Angiotensin-System Inhibitors in Patients with Coronavirus Disease-19 (COVID-19): An initiative of the International Society of Hypertension.

|                               |                                                                                                                                                                                                                                                                                                                                                                                                                                                                                                                                                                                                                                                                                                                                                                                                                                                                                                                                                                                                                                                                                                                                                                                                                                                                                                                                                                                                              |
|-------------------------------|--------------------------------------------------------------------------------------------------------------------------------------------------------------------------------------------------------------------------------------------------------------------------------------------------------------------------------------------------------------------------------------------------------------------------------------------------------------------------------------------------------------------------------------------------------------------------------------------------------------------------------------------------------------------------------------------------------------------------------------------------------------------------------------------------------------------------------------------------------------------------------------------------------------------------------------------------------------------------------------------------------------------------------------------------------------------------------------------------------------------------------------------------------------------------------------------------------------------------------------------------------------------------------------------------------------------------------------------------------------------------------------------------------------|
| Journal:                      | <i>BMJ Open</i>                                                                                                                                                                                                                                                                                                                                                                                                                                                                                                                                                                                                                                                                                                                                                                                                                                                                                                                                                                                                                                                                                                                                                                                                                                                                                                                                                                                              |
| Manuscript ID                 | bmjopen-2020-043625                                                                                                                                                                                                                                                                                                                                                                                                                                                                                                                                                                                                                                                                                                                                                                                                                                                                                                                                                                                                                                                                                                                                                                                                                                                                                                                                                                                          |
| Article Type:                 | Protocol                                                                                                                                                                                                                                                                                                                                                                                                                                                                                                                                                                                                                                                                                                                                                                                                                                                                                                                                                                                                                                                                                                                                                                                                                                                                                                                                                                                                     |
| Date Submitted by the Author: | 09-Aug-2020                                                                                                                                                                                                                                                                                                                                                                                                                                                                                                                                                                                                                                                                                                                                                                                                                                                                                                                                                                                                                                                                                                                                                                                                                                                                                                                                                                                                  |
| Complete List of Authors:     | Gnanenthiran, Sonali; The George Institute for Global Health, ; Concord Hospital,<br>Borghi, Claudio; S.Orsola Malpighi University Hospital, Department of Medical and Surgical Sciences<br>Burger, Dylan; Kidney Research Centre, Ottawa Hospital Research Institute, Department of Cellular and Molecular Medicine, University of Ottawa<br>Charchar, Fadi; Federation University Australia,<br>Poulter, Neil; Imperial Clinical Trials Unit, Imperial College London<br>Schlaich, Markus P.; University of Western Australia, Medical School<br>Steckelings, Ulrike; Department of Cardiovascular and Renal Research, University of Southern Denmark<br>Stergiou, George; Third University, Hypertension Center STRIDE-7<br>Tomaszewski, Maciej; Division of Medicine and Manchester Academic Health Science Centre, Manchester University NHS Foundation Trust Manchester<br>Unger, Thomas; Maastricht University, CARIM – School for Cardiovascular Diseases<br>Wainford, Richard; Boston University, Department of Pharmacology and Experimental Therapeutics and the Whitaker Cardiovascular Institute, Boston University School of Medicine<br>Williams, Bryan; University College London, Institute of Cardiovascular Science;<br>Rodgers, Anthony; The George Institute for Global Health, Sydney Medical School, University of Sydney,<br>Schutte, Aletta; The George Institute for Global Health |
| Keywords:                     | CARDIOLOGY, COVID-19, Hypertension < CARDIOLOGY                                                                                                                                                                                                                                                                                                                                                                                                                                                                                                                                                                                                                                                                                                                                                                                                                                                                                                                                                                                                                                                                                                                                                                                                                                                                                                                                                              |
|                               |                                                                                                                                                                                                                                                                                                                                                                                                                                                                                                                                                                                                                                                                                                                                                                                                                                                                                                                                                                                                                                                                                                                                                                                                                                                                                                                                                                                                              |

SCHOLARONE™  
Manuscripts

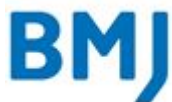

I, the Submitting Author has the right to grant and does grant on behalf of all authors of the Work (as defined in the below author licence), an exclusive licence and/or a non-exclusive licence for contributions from authors who are: i) UK Crown employees; ii) where BMJ has agreed a CC-BY licence shall apply, and/or iii) in accordance with the terms applicable for US Federal Government officers or employees acting as part of their official duties; on a worldwide, perpetual, irrevocable, royalty-free basis to BMJ Publishing Group Ltd ("BMJ") its licensees and where the relevant Journal is co-owned by BMJ to the co-owners of the Journal, to publish the Work in this journal and any other BMJ products and to exploit all rights, as set out in our [licence](#).

The Submitting Author accepts and understands that any supply made under these terms is made by BMJ to the Submitting Author unless you are acting as an employee on behalf of your employer or a postgraduate student of an affiliated institution which is paying any applicable article publishing charge ("APC") for Open Access articles. Where the Submitting Author wishes to make the Work available on an Open Access basis (and intends to pay the relevant APC), the terms of reuse of such Open Access shall be governed by a Creative Commons licence – details of these licences and which [Creative Commons](#) licence will apply to this Work are set out in our licence referred to above.

Other than as permitted in any relevant BMJ Author's Self Archiving Policies, I confirm this Work has not been accepted for publication elsewhere, is not being considered for publication elsewhere and does not duplicate material already published. I confirm all authors consent to publication of this Work and authorise the granting of this licence.

1  
2  
3 **A Prospective Meta-Analysis Protocol on Randomised Trials of Renin-Angiotensin-**  
4  
5  
6 **System Inhibitors in Patients with Coronavirus Disease-19 (COVID-19):**  
7  
8 **An initiative of the International Society of Hypertension.**  
9

10  
11  
12  
13 Sonali R Gnanenthiran<sup>1</sup>, Claudio Borghi<sup>2</sup>, Dylan Burger<sup>3</sup>, Fadi Charchar<sup>4</sup>, Neil R Poulter<sup>5</sup>,  
14 Markus Schlaich<sup>6</sup>, Ulrike Muscha Steckelings<sup>7</sup>, George S Stergiou<sup>8</sup>, Maciej Tomaszewski<sup>9</sup>,  
15 Thomas Unger<sup>10</sup>, Richard D Wainford<sup>11</sup>, Bryan Williams<sup>12</sup>, Anthony Rodgers<sup>1</sup>, Aletta E Schutte<sup>1</sup>  
16  
17  
18  
19

- 20  
21  
22 1. The George Institute for Global Health, University of New South Wales, Sydney, NSW,  
23 Australia  
24 2. Department of Medical and Surgical Sciences, University of Bologna, Bologna, Italy  
25 3. Kidney Research Centre, Ottawa Hospital Research Institute, Department of Cellular and  
26 Molecular Medicine, University of Ottawa, Ottawa, Canada  
27 4. School of Health and Life Sciences, Federation University Australia, Ballarat, Victoria,  
28 Australia  
29 5. Imperial Clinical Trials Unit, Imperial College London, United Kingdom  
30 6. Dobney Hypertension Centre, School of Medicine, Royal Perth Hospital Unit, University  
31 of Western Australia, Perth, Australia  
32 7. Department of Cardiovascular and Renal Research, University of Southern Denmark,  
33 Odense, Denmark  
34 8. Hypertension Center STRIDE-7, School of Medicine, Third Department of Medicine,  
35 Sotiria Hospital, National and Kapodistrian University of Athens, Athens, Greece  
36 9. Division of Medicine and Manchester Academic Health Science Centre, Manchester  
37 University NHS Foundation Trust Manchester, United Kingdom  
38 10. CARIM – School for Cardiovascular Diseases, Maastricht University, Maastricht, the  
39 Netherlands  
40 11. Department of Pharmacology and Experimental Therapeutics and the Whitaker  
41 Cardiovascular Institute, Boston University School of Medicine, Massachusetts, USA.  
42 12. Institute of Cardiovascular Science, University College London and National Institute for  
43 Health Research (NIHR) University College London Hospitals Biomedical Research Centre,  
44 London, United Kingdom.  
45  
46  
47  
48  
49  
50

51 **Address for correspondence:**

52 Professor Aletta E Schutte  
53 School of Public Health and Community Medicine, University of New South Wales,  
54 Kensington Campus, High Street, Sydney, NSW 2052, Australia  
55 E-mail: [a.schutte@unsw.edu.au](mailto:a.schutte@unsw.edu.au); Tel: +61 450 315 918  
56  
57  
58

59 Word count: 1843  
60

**ABSTRACT**

**Introduction:** Whether angiotensin converting enzyme inhibitors (ACEi) or angiotensin II receptor blocker (ARB) therapy should be continued, initiated or ceased in patients with coronavirus disease-19 (COVID-19) is uncertain. Given the widespread use of ACEi/ARBs worldwide, guidance on the use of these drugs is urgently needed. This prospective meta-analysis aims to pool data from randomised controlled trials (RCTs) to assess the safety and efficacy of ACEi/ARB therapy in adults infected with severe acute respiratory syndrome coronavirus-2 (SARS-CoV-2).

**Methods and Analysis:** RCTs will be eligible if they compare COVID-19 patients randomised to ACEi/ARB continuation or commencements versus no ACEi/ARB therapy; study duration  $\geq 14$  days; recruitment completed between March 2020 and May 2021. The primary outcome will be all-cause mortality at  $\leq 30$  days. Secondary outcomes will include mechanical ventilation, admission to intensive care or cardiovascular events at short term follow-up ( $\leq 30$  days), and all-cause mortality at longer term follow-up ( $>1$  month). Pre-specified sensitivity analyses will assess the effect of sex; age; comorbidities; smoking status; ethnicity; country of origin on all-cause mortality. A search of ClinicalTrials.gov has been performed, which will be followed by a formal search of trial registers, pre-print servers, MEDLINE, EMBASE and Cochrane Central Register of Controlled Trials to identify RCTs that meet inclusion criteria. To date, a search of ClinicalTrials.gov identified 19 potentially eligible trials for this meta-analysis. We will request trial investigators/sponsors to contribute standardised grouped tabular outcome data.

**Ethics and dissemination:** Ethics approval and informed consent will be the responsibility of the individual RCTs. Dissemination of results will occur by peer-reviewed publication. The

1  
2  
3 results of our analysis can inform public health policy and clinical decision making regarding  
4  
5 ACEi/ARB use in patients with COVID-19 on a global scale.  
6  
7  
8  
9  
10  
11  
12  
13  
14  
15  
16  
17  
18  
19  
20  
21  
22  
23  
24  
25  
26  
27  
28  
29  
30  
31  
32  
33  
34  
35  
36  
37  
38  
39  
40  
41  
42  
43  
44  
45  
46  
47  
48  
49  
50  
51  
52  
53  
54  
55  
56  
57  
58  
59  
60

For peer review only

**STRENGTHS AND LIMITATIONS OF THIS STUDY**

- First prospective meta-analysis of randomised controlled trials assessing the safety and efficacy of ACEi/ARBs in adults with coronavirus-19 disease (COVID-19)
- This meta-analysis uses a collaborative international approach to allow pooling and dissemination of results. This has the potential to inform international public health policy and clinical decision making for ongoing ACEi/ARB use in COVID-19 patients.
- Randomised controlled trials are currently under way with some having the potential to be underpowered. Pooling of data will overcome this shortcoming.
- The completion of these trials prior to data pooling is a limitation, as is the willingness of trialists to collaborate in data sharing.

er review only

## INTRODUCTION

Renin-angiotensin system (RAS) inhibitors, including angiotensin converting enzyme inhibitors (ACEi) and angiotensin II receptor blockers (ARB), are the most widely prescribed anti-hypertensive treatments globally, used by hundreds of millions of people worldwide.<sup>1</sup>

ACEi/ARB therapy are not only first line agents for the treatment of hypertension, but are also the cornerstones of cardiovascular and renal disease therapies such as heart failure, coronary heart disease, diabetes and chronic kidney disease. However, infection with severe acute respiratory syndrome coronavirus-2 (SARS-CoV-2) (also referred to as coronavirus disease-19 [COVID-19]) involves the viral spike protein attaching to the ACE2 receptor to enter the lungs,<sup>2</sup> with increased binding affinity a key determinant of pathogenicity.<sup>3</sup> ACEi/ARB therapies may upregulate ACE2 receptor expression.<sup>4 5</sup> Upregulated expression of ACE2 receptors on the cell surface has been postulated to increase the risk of infection with SARS-CoV-2 and the disease severity, with subsequent life-threatening complications.<sup>6 7</sup> Animal studies have demonstrated that ACEi/ARB therapy can also produce increased cardiac ACE2 mRNA levels, which may promote viral cell invasion.<sup>4 8</sup> At the same time, data from animal studies suggest that increased ACE2 expression secondary to ACEi/ARB use might have protective benefits on cardiac, renal and pulmonary function and thus reduce the severity of COVID-19.<sup>9</sup>

Observational retrospective studies in humans suggest that there is no effect of RAS blockade on COVID-19 disease severity and outcome,<sup>10-14</sup> with limited evidence of protective benefits including reduced rates of mortality,<sup>15</sup> critical disease<sup>16</sup> and admission to intensive care.<sup>17</sup> However, to date reliable randomised controlled data are unavailable to guide clinical decision-making. As a result, it is uncertain whether ACEi/ARB therapy should be continued, withdrawn, or initiated in patients with COVID-19.



1  
2  
3  
4  
5  
6 International hypertension and cardiovascular societies have consistently recommended that  
7  
8 patients continue ACEi/ARB therapy during the COVID-19 pandemic, on the basis of the strong  
9  
10 and well-documented evidence on their protective effects, but identify a need for more  
11  
12 reliable human data.<sup>18-21</sup> There are multiple randomised clinical trials (RCTs) in process, which  
13  
14 are necessary to ensure informed clinical decision making rather than relying on observational  
15  
16 human studies<sup>10-14</sup> and inconsistent animal data.<sup>4 8</sup> Most of the RCTs under way are small to  
17  
18 moderate in size (~40% aim to recruit less than 250 participants), with many unlikely to meet  
19  
20 their recruitment targets. Given the uncertainty, some trials are starting ACEi/ARB therapy  
21  
22 for possible benefit, while other trials are stopping the same therapy due to concerns about  
23  
24 harm. These are essentially the same randomisations, and so can be pooled in an ACEi/ARB  
25  
26 vs. no ACEi/ARB meta-analysis, with appropriate prespecification of preplanned analyses  
27  
28 from the two groups of trials. A prospective meta-analysis led by the International Society of  
29  
30 Hypertension will therefore be an ideal approach to address these limitations, as well as  
31  
32 promoting international collaboration. This approach entails studies to be identified,  
33  
34 evaluated, and determined to be eligible before the results of any included studies are known  
35  
36 or published, thereby avoiding some of the potential biases inherent in standard,  
37  
38 retrospective meta-analyses.  
39  
40  
41  
42  
43  
44  
45  
46  
47  
48  
49

## 50 **OBJECTIVES**

51  
52 We will therefore perform a prospective meta-analysis of RCTs recruiting COVID-19 infected  
53  
54 patients to assess the safety and efficacy of ACEi/ARB therapy compared to those not on  
55  
56 ACEi/ARBs. As primary outcome, pooled data will be used to assess all-cause mortality  
57  
58  
59  
60

1  
2  
3 associated with ACEi/ARB therapy compared to those not on ACEi/ARBs stratified by age, co-  
4 morbidity, sex, ethnicity, and trial characteristics.  
5  
6  
7  
8  
9

## 10 **METHODS AND ANALYSIS**

### 11 **Protocol Design**

12  
13 For this meta-analysis, we will only include RCTs to minimise the impact of bias and  
14 confounding. We herewith describe our methods as per the Preferred Reporting Items for  
15 Systematic Review and Meta-Analysis for protocol (PRISMA) recommendations.<sup>22</sup> Final  
16 reporting of this study will be compliant with the main PRISMA statement.  
17  
18  
19  
20  
21  
22  
23  
24  
25  
26

### 27 **Eligibility Criteria**

28  
29 For clinical trials to be eligible for inclusion, the following criteria must be met: (i) RCTs  
30 recruiting between March 2020 and May 2021; (ii) aged  $\geq 18$  years; (iii) SARS-CoV-2 infection  
31 confirmed; (iv) comparison of patients randomised to ACEi/ARB versus no ACEi/ARB therapy;  
32 confirmed; (iv) comparison of patients randomised to ACEi/ARB versus no ACEi/ARB therapy;  
33 (v) findings reported in English; (vi) trial duration  $\geq 14$  days; (viii) oral administration of  
34 ACEi/ARB therapies.  
35  
36  
37  
38  
39  
40  
41  
42  
43  
44

45 We will include trials that investigate continuation versus cessation of ACEi/ARB among  
46 patients currently treated with ACEi/ARB; and trials that report initiation of ACEi/ARB versus  
47 control in those not currently treated with such therapies. Studies must contain sufficient  
48 detail and be able to provide at least one outcome outlined within our data extraction form  
49 (Table 1). The exclusion criteria will be at the discretion of each individual trial.  
50  
51  
52  
53  
54  
55  
56  
57  
58  
59  
60

1  
2  
3 The intervention will comprise continuation or initiation of ACEi/ARB therapy. The control will  
4  
5 be discontinuation of current ACEi/ARB therapy, substitution with an equivalent dose of non-  
6  
7 ACEi/ARB therapy, placebo or usual care.  
8  
9

### 10 11 12 13 **Outcomes**

14  
15 The primary outcome will be all-cause mortality at  $\leq 30$  days. Secondary outcomes will include  
16  
17 mechanical ventilation at  $\leq 30$  days; admission to intensive care at  $\leq 30$  days; myocardial  
18  
19 infarction at  $\leq 30$  days, revascularisation at  $\leq 30$  days, congestive cardiac failure at  $\leq 30$  days;  
20  
21 pulmonary embolism and/or deep vein thrombosis at  $\leq 30$  days; all-cause mortality at  $>1$   
22  
23 month follow-up. Standardised grouped tabular de-identified data will be requested from  
24  
25 triallists for both short-term ( $\leq 30$  days) and longer term ( $>1$  month) follow up where available  
26  
27 (Table 1). Individual identifiable patient data will not be requested.  
28  
29  
30  
31  
32  
33  
34

35 Sensitivity analyses will be performed depending on data availability, but will aim to assess  
36  
37 all-cause mortality at  $\leq 30$  days and  $>1$  month for the following subgroups: (i) sex: male versus  
38  
39 female; (ii) age:  $<60$  years versus  $\geq 60$  years; (iii) comorbidities: hypertension versus no  
40  
41 hypertension, diabetes versus no diabetes, chronic kidney disease (CKD) defined as  $eGFR < 60$   
42  
43  $mL/min/1.73m^2$  versus no CKD, cardiovascular disease (CVD) [defined as established coronary  
44  
45 artery disease, heart failure, arrhythmia and/or stroke] versus no CVD, chronic obstructive  
46  
47 pulmonary disease versus no chronic obstructive pulmonary disease; (iv) smoking status: ever  
48  
49 smoked versus non-smokers; (v) hospitalisation status: hospitalised versus non-hospitalised  
50  
51 patients; (vi) ethnicity: White, South-East/East Asian, South Asian, African and Other; (vii) trial  
52  
53 type: randomised trials that investigate continuation and cessation of ACEi/ARBs among  
54  
55 patients currently treated with ACEi/ARBs, versus trials that investigate initiation of  
56  
57  
58  
59  
60

1  
2  
3 ACEi/ARBs in those not currently treated with such therapies compared to control; (vii)  
4  
5 region: Americas, Europe, Africa, South and West Asia/Middle East, and North Asia/South-  
6  
7 East Asia/Oceania (viii) ACEi and ARB separately if feasible (Supplemental Tables 1 and 2).  
8  
9

### 10 11 12 13 **Search strategy and searching sources**

14  
15 An electronic search of ClinicalTrial.gov was performed to identify potential ongoing trials for  
16  
17 inclusion in the meta-analysis. Figure 1 summarises the trial search as of July 2020 performed  
18  
19 using the search terms: coronavirus-19, COVID-19, SARS-CoV-2, randomised controlled trial,  
20  
21 ACEi and/or ARB. A total of 19 trials were identified which potentially met the eligibility  
22  
23 criteria (Figure 1, Table 2). Of these, 5 trials evaluated the continuation of ACEi/ARB therapies  
24  
25 in those already on such therapies compared to discontinuation, and 15 trials involved  
26  
27 initiation of ACEi/ARB therapies in those not on such therapies. Nine trials did not meet  
28  
29 inclusion criteria due to (a) not assessing ACEi/ARB therapies (n=4), (b) absence of a control  
30  
31 group (n=2), (c) use of non-oral administration of ACEi/ARB therapies (n=2), or (d) recruitment  
32  
33 of patients with active malignancy (n=1). We extracted information about eligible  
34  
35 investigators to invite them to participate in the prospective meta-analysis by contributing  
36  
37 tabular data. An invitation letter will be sent via email and will include details about the study  
38  
39 protocol, offer of authorship, identification of the time for data retrieval and confirmation of  
40  
41 data security.  
42  
43  
44  
45  
46  
47  
48  
49  
50

51  
52 This search will be continuously updated, and investigators of newly reported and eligible  
53  
54 trials will be invited to join the collaboration. Using the Cochrane Collaboration guidelines,<sup>23</sup>  
55  
56 electronic searches of MEDLINE (1996–present), EMBASE (1996–present) and the Cochrane  
57  
58 Central Register of Controlled Trials (most recent edition) will also be performed to identify  
59  
60

1  
2  
3 any other RCTs that meet inclusion criteria. A comprehensive search strategy using MeSH  
4 terms and text words will be used. Two investigators (SG and AS) will screen the abstracts for  
5  
6 potential inclusion against the eligibility criteria, and screen the full texts. Reference  
7  
8 management software (EndNote) will be used to store identified records.  
9  
10  
11  
12  
13  
14

15 All provided data will be stored on a password protected server, with limited access only to  
16  
17 those directly involved in data analysis.  
18  
19  
20  
21  
22

### 23 **Study Evaluation**

24  
25 When conducting the prospective meta-analysis of RCTs, we will undertake a quality  
26  
27 assessment of each RCT using the CONSORT (CONsolidated Standards of Reporting Trials)  
28  
29 checklist.<sup>24</sup> Randomisation procedures, treatment allocation according to assignment,  
30  
31 outcomes collected and compared across groups; blinding methods; and risk of bias both at  
32  
33 study and outcome levels will also be assessed using the Cochrane Risk of Bias Tool.<sup>25</sup> Two  
34  
35 investigators (SG and AS) will independently review the articles and any disagreements will  
36  
37 be adjudicated by a third independent investigator (AR).  
38  
39  
40  
41  
42  
43  
44

### 45 **Statistical Analysis**

46  
47 Trial-specific outcome data will be pooled. For binary outcomes, risk ratios and 95% CI will be  
48  
49 estimated using log-binomial mixed-effects models (or odds ratios from logistic models as  
50  
51 required). Key results will be presented using Forest plots, and the  $I^2$  statistic will be used to  
52  
53 quantify the degree of heterogeneity between studies.<sup>26</sup> A two-tailed p-value risk of 5% will  
54  
55 be used for hypothesis testing. A fixed effects analysis will be used unless there is significant  
56  
57 heterogeneity (as evidenced by  $I^2 > 70\%$  and quantitatively large variation), in which case  
58  
59  
60

1  
2  
3 pooling will not be performed.<sup>27</sup> Publication bias will be assessed by visual inspection of  
4  
5 funnel plots and formally using Egger's method to evaluate the tendency of publishing studies  
6  
7 with statistically significant findings.<sup>28</sup> We will use meta-regression analyses to further explore  
8  
9 heterogeneity of treatment effects if considerable residual heterogeneity remains after  
10  
11 controlling for variables. Analyses will also be stratified by the prespecified subgroup analysis  
12  
13 as mentioned above. In general, reporting of the findings will follow PRISMA guidelines.<sup>22</sup> All  
14  
15 analyses will be conducted using Review Manager 5.3 software (Copenhagen, The Nordic  
16  
17 Cochrane Centre, The Cochrane Collaboration, 2014).  
18  
19  
20  
21  
22  
23  
24

### 25 **Data Statement**

26  
27 We will not have access to identifiable patient information. All data sharing and storage  
28  
29 procedures will be compliant with the Australian Data Privacy Act of 1988. All trial data will  
30  
31 be considered confidential and will not be provided to any third party. Data will be stored on  
32  
33 site at The George Institute for Global Health, King St Campus, Sydney, Australia, with strict  
34  
35 confidentiality and comprehensive data security.  
36  
37  
38  
39  
40  
41

### 42 **Ethics and dissemination**

43  
44 All individual trials will require Ethics Committee or Institution Review Board approval. We  
45  
46 will publish our findings in peer-reviewed medical journals. Publications will be in the name  
47  
48 of the collaborative group involving all trialists who provided data. Further, we will share and  
49  
50 present our findings at scientific meetings and through the networks and memberships across  
51  
52 professional societies.  
53  
54  
55  
56  
57  
58

### 59 **Implications of the review**

1  
2  
3 Given the widespread use of ACE inhibitors and ARBs worldwide, guidance on the use of  
4  
5 ACEi/ARBs in adults with COVID-19 infection is urgently needed relying on evidence beyond  
6  
7 observational data. This collaborative international approach will allow dissemination of  
8  
9 results, which will inform public health policy and clinical decision making for ongoing  
10  
11 ACEi/ARBs use on an international scale. Healthcare providers and policy-makers can use the  
12  
13 findings to improve the clinical decision making by developing strategies and guidelines to  
14  
15 guide use of ACEi/ARBs in hypertension, cardiovascular disease and renal disease.  
16  
17  
18  
19  
20  
21  
22

### 23 **Patient and public involvement**

24  
25 Patients were not involved in the development of the research question, outcome measure  
26  
27 and study design.  
28  
29  
30  
31  
32  
33  
34  
35  
36  
37  
38  
39  
40  
41  
42  
43  
44  
45  
46  
47  
48  
49  
50  
51  
52  
53  
54  
55  
56  
57  
58  
59  
60

## REFERENCES

1. Gu Q, Burt VL, Dillon CF, Yoon S. Trends in antihypertensive medication use and blood pressure control among United States adults with hypertension: the National Health And Nutrition Examination Survey, 2001 to 2010. *Circulation* 2012 126(17):2105-14.
2. Li W, Moore MJ, Vasilieva N, Sui J, Wong SK, Berne MA, Somasundaran M, Sullivan JL, Luzuriaga K, Greenough TC, Choe H, Farzan M. Angiotensin-converting Enzyme 2 Is a Functional Receptor for the SARS Coronavirus. *Nature* 2003;426(6965):450-54.
3. Hoffmann M, Kleine-Weber H, Schroeder S, et al. SARS-CoV-2 cell entry depends on ACE2 and TMPRSS2 and is blocked by a clinically proven protease inhibitor. *Cell* 2020;181:271-80.
4. Ferrario CM, Jessup J, Chappell MC, Averill DB, Brosnihan KB, Tallant EA, Diz DI, Gallagher PE. Effect of angiotensin-converting enzyme inhibition and angiotensin II receptor blockers on cardiac angiotensin-converting enzyme 2. *Circulation* 2005 111(20):2605-10.
5. Igase M, Kohara K, Nagai T, Miki T and Ferrario CM. Increased expression of angiotensin converting enzyme 2 in conjunction with reduction of neointima by angiotensin II type 1 receptor blockade. *Hypertens Res* 2008;31:553-9.
6. Fang L, Karakiulakis G, Roth M. Are patients with hypertension and diabetes mellitus at increased risk for COVID-19 infection? *Lancet Resp Med* 2020;8(4):e21.
7. Sommerstein R, Grani C. Preventing a covid-19 pandemic: ACE inhibitors as a potential risk factor for fatal Covid-19. *BMJ* 2020;368:m810.
8. Ocaranza MP, Moya J, Barrientos V, Alzamora R, Hevia D, Morales C, Pinto M, Escudero N, García L, Novoa U, Ayala P, Díaz-Araya G, Godoy I, Chiong M, Lavandero S, Jalil JE, Michea L. Angiotensin-(1-9) Reverses Experimental Hypertension and Cardiovascular Damage by Inhibition of the Angiotensin Converting enzyme/Ang II Axis. *J Hypertens* 2014 32(4):771-83.
9. Sparks MA, South A, Welling P, Luther M, Cohen J, Byrd JB, Burrell L, Battle D, Tomlinson L, Bhalla V, Rheault MN, Soler MJ, Swaminathan S, Hiremath S. Sound Science Before Quick Judgement Regarding RAS Blockade in COVID-19. *Clin J Am Soc Nephrol* 2020 7(15):714-16.
10. de Abajo FJ, Rodriguez-Martin S, Lerma V, Mejía-Abril G, Aguilar M, García-Luque A, Laredo L, Laosa O, Centeno-Soto GA, Ángeles Gálvez M, Puerro M, González-Rojano E, Pedraza L, de Pablo I, Abad-Santos F, Rodríguez-Mañas L, Gil M, Tobías A, Rodríguez-Miguel A, Rodríguez-Puyol D; MED-ACE2-COVID19 study group. Use of renin-angiotensin-aldosterone system inhibitors and risk of COVID-19 requiring admission to hospital: a case-population study. *Lancet* 2020;395(10238):1705-14.
11. Jung SY, Choi JC, You SH, Kim WY. Association of renin-angiotensin-aldosterone system inhibitors with COVID-19-related outcomes in Korea: a nationwide population-based cohort study. *Clin Infect Dis* 2020;Epub ahead of print
12. Li J, Wang X, Chen J, Zhang H, Deng A. Association of Renin-Angiotensin System Inhibitors With Severity or Risk of Death in Patients With Hypertension Hospitalized for Coronavirus Disease 2019 (COVID-19) Infection in Wuhan, China. *JAMA Cardiol* 2020;epub ahead of print
13. Mancia G, Rea F, Ludergnani M, Apolone G, Corrao G. Renin-Angiotensin-Aldosterone System Blockers and the Risk of Covid-19. *N Engl J Med* 2020;382(25):2431-40.



14. Reynolds HR, Adhikari S, Pulgarin C, Troxel AB, Iturrate E, Johnson SB, Hausvater A, Newman JD, Berger JS, Bangalore S, Katz SD, Fishman GI, Kunichoff D, Chen Y, Ogedegbe G, Hochman JS. Renin-Angiotensin-Aldosterone System Inhibitors and Risk of Covid-19. *N Engl J Med* 2020;382(25):2441-48.
15. Zhang P, Zhu L, Cai J, Lei F, Qin J, Xie J, Liu Y, Zhao Y, et al. Association of Inpatient Use of Angiotensin-Converting Enzyme Inhibitors and Angiotensin II Receptor Blockers With Mortality Among Patients With Hypertension Hospitalized With COVID-19. *Circ Res* 2020 126(12):1671-81.
16. Pirola CJ, Sookoian S. Estimation of Renin-Angiotensin-Aldosterone-System (RAAS)-Inhibitor Effect on COVID-19 Outcome: A Meta-analysis. *J Infect* 2020 S0163-4453(20):30329-7.
17. Felice C, Nardin C, Di Tanna GL, Grossi U, Bernardi E, Scaldaferrri L, Romagnoli M, Tonon L, Cavasin P, Novello S, Scarpa R, Farnia A, De Menis E, Rigoli R, Cinetto F, Pauletto P, Agostini C, Rattazzi M. Use of RAAS inhibitors and risk of clinical deterioration in COVID-19: results from an Italian cohort of 133 hypertensives. *Am J Hypertens* 2020; epub ahead of print
18. International Society of Hypertension. Statement on COVID-19. 2020
19. American College of Cardiology, American Heart Association and Heart Failure Society of America. Patients taking ACE-i and ARBs who contract COVID-19 should continue treatment, unless otherwise advised by their physician 2020 [Available from: <https://www.acc.org/latest-in-cardiology/articles/2020/03/17/08/59/hfsa-acc-aha-statement-addresses-concerns-re-using-raas-antagonists-in-covid-19> accessed May 6 2020.
20. European Society of Cardiology Council on Hypertension. Position statement of the ESC Council on Hypertension on ACE-inhibitors and angiotensin receptor blockers 2020 [Available from: [https://www.escardio.org/Councils/Council-on-Hypertension-\(CHT\)/News/position-statement-of-the-esc-council-on-hypertension-on-ace-inhibitors-and-ang](https://www.escardio.org/Councils/Council-on-Hypertension-(CHT)/News/position-statement-of-the-esc-council-on-hypertension-on-ace-inhibitors-and-ang).
21. European Society of Hypertension. Statement on COVID-19 2020 [Available from: <https://www.eshonline.org/spotlights/esh-statement-on-covid-19/>.
22. Liberati A, Altman DG, Tetzlaff J, Mulrow C, Gøtzsche PC, Ioannidis JPA, Clarke M, Devereaux PJ, Kleijnen J, Moher D. The PRISMA statement for reporting systematic reviews and meta-analyses of studies that evaluate healthcare interventions: explanation and elaboration. *BMJ* 2009;21(339)
23. Higgins J, Thomas J, Chandler J, Cumpston M, Li T, Page MJ, Welch VA (editors). *Cochrane Handbook for Systematic Reviews of Interventions* version 6.0 (updated July 2019): Cochrane, 2019.
24. Schulz KF, Altman DG, Moher D, for the CONSORT Group. CONSORT 2010 Statement: updated guidelines for reporting parallel group randomised trials. *BMJ* 2010;340:c332.
25. Higgins JP, Altman DG, Gotzsche P, Jüni P, et al. Cochrane bias methods group; cochrane statistical methods group. the cochrane collaboration's tool for assessing risk of bias in randomised trials. *BMJ* 2011;343:1–9.
26. Higgins JPT, Thompson SG. Quantifying heterogeneity in a meta-analysis. *Stat Med* 2002;21(11):1539–58.
27. Hedges LV, Vevea JL. Fixed- and random-effects models in meta-analysis. *Psychol Methods* 1998;3(4):486–504.

- 1  
2  
3 28. Egger M, Davey Smith G, Schneider M, et al. Bias in meta-analysis detected by a simple,  
4 graphical test. *BMJ* 1997;315:629–34.  
5  
6  
7  
8  
9  
10  
11  
12  
13  
14  
15  
16  
17  
18  
19  
20  
21  
22  
23  
24  
25  
26  
27  
28  
29  
30  
31  
32  
33  
34  
35  
36  
37  
38  
39  
40  
41  
42  
43  
44  
45  
46  
47  
48  
49  
50  
51  
52  
53  
54  
55  
56  
57  
58  
59  
60

For peer review only

1  
2  
3 **Authors' Contributions:** SG, AR and AES were involved in the planning and writing of this  
4  
5 protocol. CB, DB, FC, NRP, MS, UMS, GSS, MT, TU, RDW and BW reviewed the protocol and  
6  
7 provided intellectual input.  
8  
9

10  
11  
12  
13 **Funding Statement:** This research received no specific grant from any funding agency in the  
14  
15 public, commercial or not-for-profit sectors.  
16  
17

18  
19  
20 **Competing Interests Statement:** Nil competing interests.  
21  
22  
23  
24  
25  
26  
27  
28  
29  
30  
31  
32  
33  
34  
35  
36  
37  
38  
39  
40  
41  
42  
43  
44  
45  
46  
47  
48  
49  
50  
51  
52  
53  
54  
55  
56  
57  
58  
59  
60

For peer review only

1  
2  
3  
4  
5  
6  
7  
8  
9  
10  
11  
12  
13  
14  
15  
16  
17  
18  
19  
20  
21  
22  
23  
24  
25  
26  
27  
28  
29  
30  
31  
32  
33  
34  
35  
36  
37  
38  
39  
40  
41  
42  
43  
44  
45  
46  
47  
48  
49  
50  
51  
52  
53  
54  
55  
56  
57  
58  
59  
60

**Figure 1: Flowchart of Trial Inclusion**

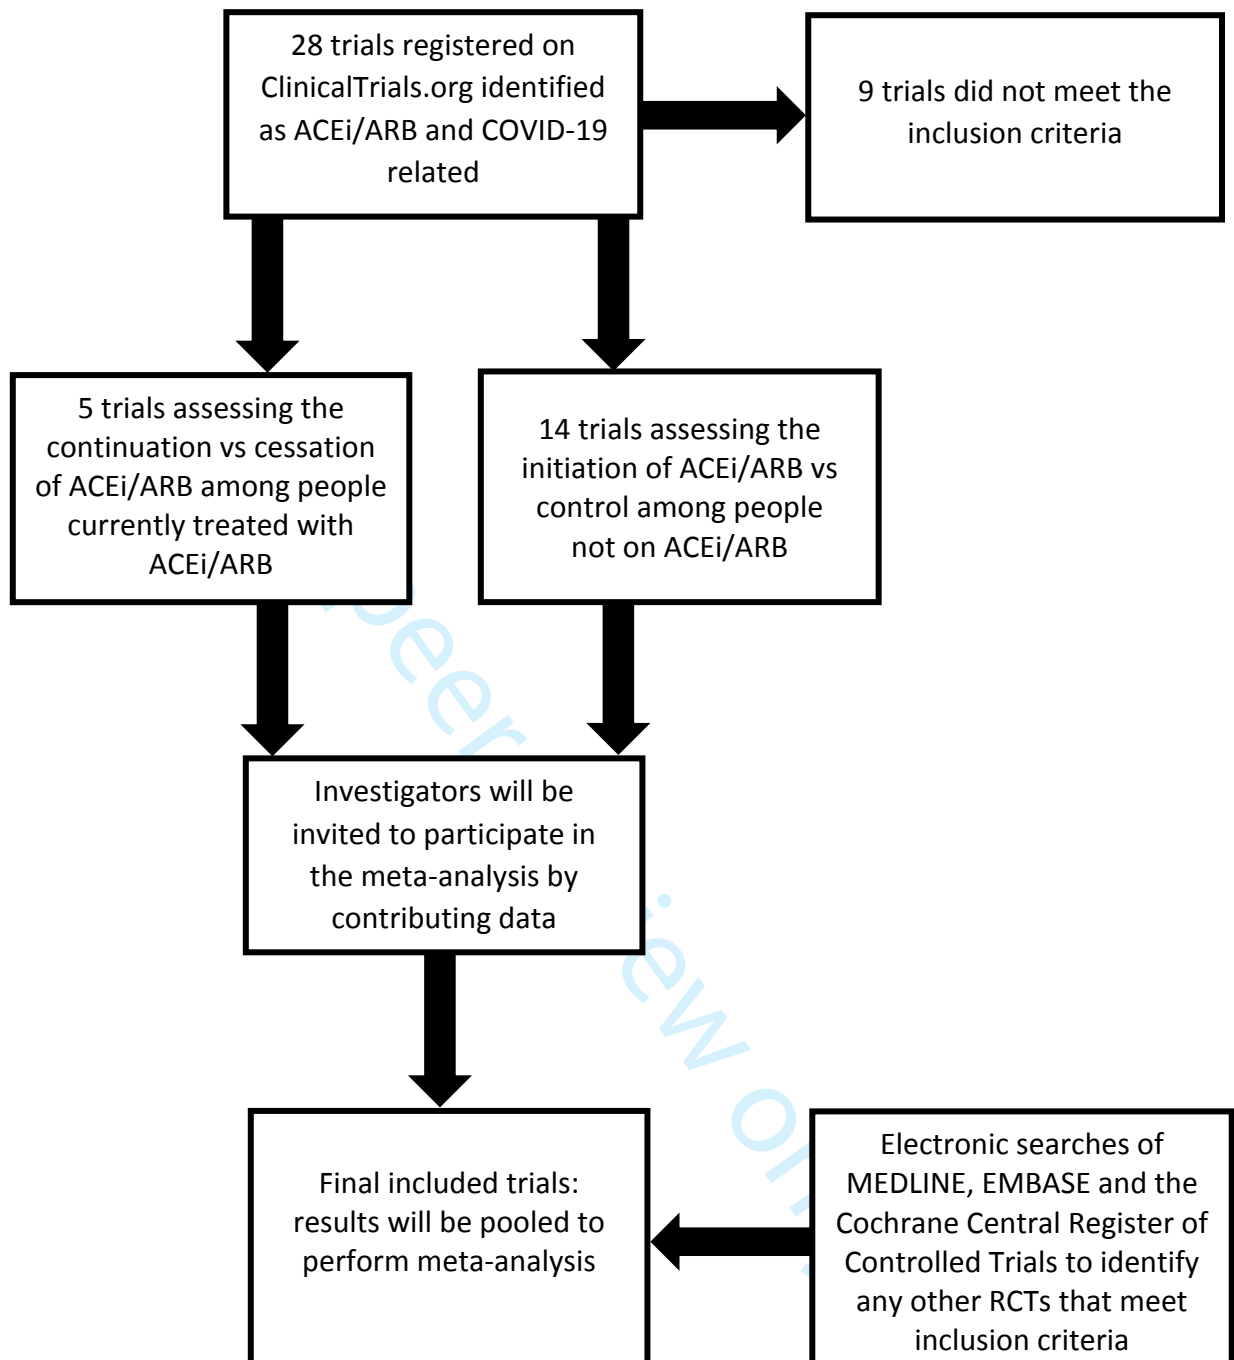

**Table 1: Outcome Grouped Tabular Data**

|                                                 | <b>CONTROL GROUP:<br/>NO ACEi/ARB</b> | <b>INTERVENTION<br/>GROUP: ACEi/ARB</b> |
|-------------------------------------------------|---------------------------------------|-----------------------------------------|
| <b>BASELINE CHARACTERISTICS</b>                 |                                       |                                         |
| N                                               |                                       |                                         |
| Mean Age $\pm$ SD (years)                       |                                       |                                         |
| Sex, n                                          |                                       |                                         |
| Men                                             |                                       |                                         |
| Women                                           |                                       |                                         |
| Past Medical History, n                         |                                       |                                         |
| Hypertension                                    |                                       |                                         |
| Diabetes                                        |                                       |                                         |
| Chronic Kidney Disease                          |                                       |                                         |
| Smoking                                         |                                       |                                         |
| Ever-smoked                                     |                                       |                                         |
| Non-smoker                                      |                                       |                                         |
| <b>OUTCOMES FOR <math>\leq 30</math> DAYS</b>   |                                       |                                         |
| <b>Total number of patients in the group, n</b> |                                       |                                         |
| All-cause mortality                             |                                       |                                         |
| Myocardial Infarction                           |                                       |                                         |
| Congestive Cardiac Failure                      |                                       |                                         |
| Revascularisation                               |                                       |                                         |
| Admission to Intensive Care Unit                |                                       |                                         |
| Need for Mechanical ventilation                 |                                       |                                         |
| Hospitalisation (if outpatient study)           |                                       |                                         |
| Pulmonary embolism/deep vein thrombosis         |                                       |                                         |
| <b>OUTCOMES <math>&gt;1</math> MONTH, n</b>     |                                       |                                         |
| All-cause mortality                             |                                       |                                         |

\*N=number, SD standard deviation, ACEi angiotensin converting enzyme inhibitors, ARB angiotensin II receptor blocker

Table 2: Potential Eligible Randomised Controlled Trials of Adults with COVID-19

| COUNTRY                                               | CLINICAL TRIALS.GOV NUMBER | TREATMENT GROUP        | COMPARISON GROUP                  | SAMPLE SIZE | INCLUSION CRITERIA                                                                                                          | FOLLOW UP |
|-------------------------------------------------------|----------------------------|------------------------|-----------------------------------|-------------|-----------------------------------------------------------------------------------------------------------------------------|-----------|
| Pennsylvania, USA                                     | NCT04338009                | Continue ACEi/ARB      | Discontinue ACEi/ARB              | 152         | 18 years+ using ACEi/ARB, hospitalised                                                                                      | 28 days   |
| Paris, France                                         | NCT04329195                | Continue ACEi/ARB      | Discontinue ACEi/ARB              | 554         | 18 years+ using ACEi/ARB, hospitalised                                                                                      | 28 days   |
| Sao Paulo, Brazil                                     | NCT04364893                | Continue ACEi/ARB      | Discontinue ACEi/ARB              | 500         | 18 years+ using ACEi/ARB, hospitalised                                                                                      | 30 days   |
| Copenhagen, Denmark                                   | NCT04351581                | Continue ACEi/ARB      | Discontinue ACEi/ARB              | 215         | 18 years+ using ACEi/ARB, hospitalised                                                                                      | 30 days   |
| Munich, Germany; Innsbruck, Austria                   | NCT04353596                | Continue ACEi/ARB      | Discontinue ACEi/ARB              | 208         | 18 years+ using ACEi/ARB,                                                                                                   | 30 days   |
| Cairo, Egypt                                          | NCT04345406                | Captopril or enalapril | Placebo                           | 60          | 18 years+, hospitalised                                                                                                     | 6 months  |
| Vienna and Innsbruck, Austria                         | NCT04351724                | Candesartan            | Non-RAS blockade/standard of care | 500*        | 18 years+, hospitalised                                                                                                     | 29 days   |
| Minnesota, USA                                        | NCT04312009                | Losartan               | Placebo                           | 200         | 18 years+, hospitalised                                                                                                     | 90 days   |
| Minnesota, USA                                        | NCT04311177                | Losartan               | Placebo                           | 580         | 18 years+, outpatients                                                                                                      | 28 days   |
| California, USA                                       | NCT04340557                | Losartan               | Standard care                     | 200         | 18 years+, mild to moderate respiratory disease with an oxygen requirement                                                  | 45 days   |
| New York, USA                                         | NCT04328012                | Losartan               | Placebo                           | 4000*       | 18 years+, hospitalised                                                                                                     | 60 days   |
| Eindhoven, Nijmegen, Kerkrade, Rotterdam, Netherlands | NCT04335786                | Valsartan              | Placebo                           | 651         | 18 years+, hospitalised                                                                                                     | 90 days   |
| San Diego, USA                                        | NCT04366050                | Ramipril               | Placebo                           | 560         | 18 years+, hospitalised                                                                                                     | 14 days   |
| Buenos Aires, Argentina                               | NCT04355936                | Telmisartan            | Standard care                     | 400         | 18 years+ using ARB/ACE                                                                                                     | 90 days   |
| Sydney, Australia                                     | NCT04394117                | ARB                    | Standard care                     | 605         | 18 years+, SBP $\geq$ 125 or SBP $\geq$ 115 on non RAASI BP medications, hospitalised or high-risk features managed at home | 90 days   |
| Lagos, Nigeria; Rawalpindi, Pakistan                  | NCT04343001                | Losartan               | Standard care                     | 10,000*     | 40 years+, hospitalisation                                                                                                  | 28 days   |
| Hawaii, USA                                           | NCT04360551                | Telmisartan            | Placebo                           | 40          | 18 years+, outpatients                                                                                                      | 21 days   |
| Bordeaux, France                                      | NCT04356495                | Telmisartan            | Control (vitamins)                | 1057*       | 65 years+, outpatient                                                                                                       | 28 days   |
| Strasbourg, France                                    | NCT04359953                | Telmisartan            | Standard care                     | 1600*       | 60 years+ if dementia or 75 years+, hospitalised                                                                            | 28 days   |

\* Sample size consists of multiple trial arms including non-ACEi/ARB therapies or non-control groups  
 RAS, renin-angiotensin system; ACEi, angiotensin converting enzyme inhibitors; ARB, angiotensin II receptor blockers; BP, blood pressure

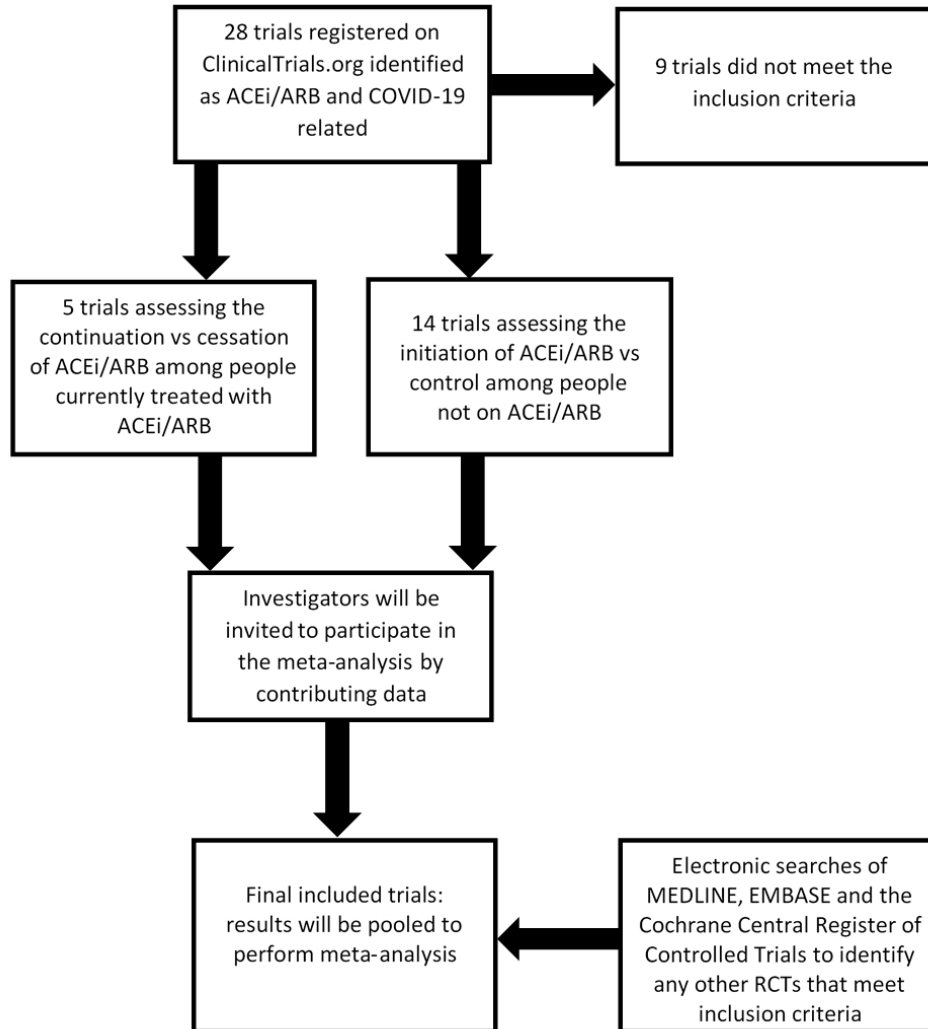

Figure 1: Flowchart of Trial Inclusion

173x208mm (144 x 144 DPI)

1  
2  
3 **A Prospective Meta-Analysis Protocol on Randomised Trials of Renin-Angiotensin-**  
4  
5  
6 **System Inhibitors in Patients with Coronavirus Disease-19 (COVID-19):**  
7  
8 **An initiative of the International Society of Hypertension.**  
9

10  
11  
12  
13 **Supplemental Data**  
14

15  
16 Sonali R Gnanenthiran<sup>1</sup>, Claudio Borghi<sup>2</sup>, Dylan Burger<sup>3</sup>, Fadi Charchar<sup>4</sup>, Neil R Poulter<sup>5</sup>,  
17  
18 Markus Schlaich<sup>6</sup>, Ulrike Muscha Steckelings<sup>7</sup>, George S Stergiou<sup>8</sup>, Maciej Tomaszewski<sup>9</sup>,  
19  
20 Thomas Unger<sup>10</sup>, Richard D Wainford<sup>11</sup>, Bryan Williams<sup>12</sup>, Anthony Rodgers<sup>1</sup>, Aletta E Schutte<sup>1</sup>  
21

- 22  
23  
24  
25  
26  
27  
28  
29  
30  
31  
32  
33  
34  
35  
36  
37  
38  
39  
40  
41  
42  
43  
44  
45  
46  
47  
48  
49  
50  
51  
52  
53  
54  
55  
56  
57  
58  
59  
60
1. The George Institute for Global Health, University of New South Wales, Sydney, NSW, Australia
  2. Department of Medical and Surgical Sciences, University of Bologna, Bologna, Italy
  3. Kidney Research Centre, Ottawa Hospital Research Institute, Department of Cellular and Molecular Medicine, University of Ottawa, Ottawa, Canada
  4. School of Health and Life Sciences, Federation University Australia, Ballarat, Victoria, Australia
  5. Imperial Clinical Trials Unit, Imperial College London, United Kingdom
  6. Dobney Hypertension Centre, School of Medicine, Royal Perth Hospital Unit, University of Western Australia, Perth, Australia
  7. Department of Cardiovascular and Renal Research, University of Southern Denmark, Odense, Denmark
  8. Hypertension Center STRIDE-7, School of Medicine, Third Department of Medicine, Sotiria Hospital, National and Kapodistrian University of Athens, Athens, Greece
  9. Division of Medicine and Manchester Academic Health Science Centre, Manchester University NHS Foundation Trust Manchester, United Kingdom
  10. CARIM – School for Cardiovascular Diseases, Maastricht University, Maastricht, the Netherlands
  11. Department of Pharmacology and Experimental Therapeutics and the Whitaker Cardiovascular Institute, Boston University School of Medicine, Massachusetts, USA.
  12. Institute of Cardiovascular Science, University College London and National Institute for Health Research (NIHR) University College London Hospitals Biomedical Research Centre, London, United Kingdom.



**Supplemental Table 1. Subgroup Analysis for All-Cause Mortality at Short Term Follow up (≤30 days)**

|                           | NO ACEi/ARB group |                       | ACEi/ARB group |                       |
|---------------------------|-------------------|-----------------------|----------------|-----------------------|
|                           | No. of Deaths     | Total no. in subgroup | No. of Deaths  | Total no. in subgroup |
| Sex                       |                   |                       |                |                       |
| Men                       |                   |                       |                |                       |
| Women                     |                   |                       |                |                       |
| Age                       |                   |                       |                |                       |
| <60 years                 |                   |                       |                |                       |
| ≥60 years                 |                   |                       |                |                       |
| Ethnicity                 |                   |                       |                |                       |
| White                     |                   |                       |                |                       |
| South-East/East Asian     |                   |                       |                |                       |
| South Asian               |                   |                       |                |                       |
| African                   |                   |                       |                |                       |
| Other                     |                   |                       |                |                       |
| Comorbidities             |                   |                       |                |                       |
| Hypertension              |                   |                       |                |                       |
| No Hypertension           |                   |                       |                |                       |
| Diabetes Mellitus         |                   |                       |                |                       |
| No Diabetes Mellitus      |                   |                       |                |                       |
| Chronic Kidney Disease    |                   |                       |                |                       |
| No Chronic Kidney Disease |                   |                       |                |                       |
| Cardiovascular Disease    |                   |                       |                |                       |
| No Cardiovascular Disease |                   |                       |                |                       |
| COPD                      |                   |                       |                |                       |
| No COPD                   |                   |                       |                |                       |
| Smoking Status            |                   |                       |                |                       |
| Ever Smoked               |                   |                       |                |                       |
| Non-smoker                |                   |                       |                |                       |

\*ACEi angiotensin converting enzyme inhibitor, ARB angiotensin II receptor blocker, COPD chronic obstructive pulmonary disease

**Supplemental Table 2: Subgroup Analysis for All-Cause Mortality at Longer Term Follow up (>1 month)**

|                           | NO ACEi/ARB group |                       | ACEi/ARB group |                       |
|---------------------------|-------------------|-----------------------|----------------|-----------------------|
|                           | No. of Deaths     | Total no. in subgroup | No. of Deaths  | Total no. in subgroup |
| Sex                       |                   |                       |                |                       |
| Men                       |                   |                       |                |                       |
| Women                     |                   |                       |                |                       |
| Age                       |                   |                       |                |                       |
| <60 years                 |                   |                       |                |                       |
| ≥60 years                 |                   |                       |                |                       |
| Ethnicity                 |                   |                       |                |                       |
| White                     |                   |                       |                |                       |
| South-East/East Asian     |                   |                       |                |                       |
| South Asian               |                   |                       |                |                       |
| African                   |                   |                       |                |                       |
| Other                     |                   |                       |                |                       |
| Comorbidities             |                   |                       |                |                       |
| Hypertension              |                   |                       |                |                       |
| No Hypertension           |                   |                       |                |                       |
| Diabetes Mellitus         |                   |                       |                |                       |
| No Diabetes Mellitus      |                   |                       |                |                       |
| Chronic Kidney Disease    |                   |                       |                |                       |
| No Chronic Kidney Disease |                   |                       |                |                       |
| Cardiovascular Disease    |                   |                       |                |                       |
| No Cardiovascular Disease |                   |                       |                |                       |
| COPD                      |                   |                       |                |                       |
| No COPD                   |                   |                       |                |                       |
| Smoking Status            |                   |                       |                |                       |
| Ever Smoked               |                   |                       |                |                       |
| Non-smoker                |                   |                       |                |                       |

\*ACEi angiotensin converting enzyme inhibitor, ARB angiotensin II receptor blocker, COPD chronic obstructive pulmonary disease

**PRISMA-P (Preferred Reporting Items for Systematic review and Meta-Analysis Protocols) 2015 checklist: recommended items to address in a systematic review protocol\***

| Section and topic                 | Item No | Checklist item                                                                                                                                                                                                                | Page |
|-----------------------------------|---------|-------------------------------------------------------------------------------------------------------------------------------------------------------------------------------------------------------------------------------|------|
| <b>ADMINISTRATIVE INFORMATION</b> |         |                                                                                                                                                                                                                               |      |
| Title:                            |         |                                                                                                                                                                                                                               |      |
| Identification                    | 1a      | Identify the report as a protocol of a systematic review                                                                                                                                                                      | 1    |
| Update                            | 1b      | If the protocol is for an update of a previous systematic review, identify as such                                                                                                                                            |      |
| Registration                      | 2       | If registered, provide the name of the registry (such as PROSPERO) and registration number                                                                                                                                    | N/A  |
| Authors:                          |         |                                                                                                                                                                                                                               |      |
| Contact                           | 3a      | Provide name, institutional affiliation, e-mail address of all protocol authors; provide physical mailing address of corresponding author                                                                                     | 1    |
| Contributions                     | 3b      | Describe contributions of protocol authors and identify the guarantor of the review                                                                                                                                           | 16   |
| Amendments                        | 4       | If the protocol represents an amendment of a previously completed or published protocol, identify as such and list changes; otherwise, state plan for documenting important protocol amendments                               | N/A  |
| Support:                          |         |                                                                                                                                                                                                                               |      |
| Sources                           | 5a      | Indicate sources of financial or other support for the review                                                                                                                                                                 | 16   |
| Sponsor                           | 5b      | Provide name for the review funder and/or sponsor                                                                                                                                                                             | N/A  |
| Role of sponsor or funder         | 5c      | Describe roles of funder(s), sponsor(s), and/or institution(s), if any, in developing the protocol                                                                                                                            | N/A  |
| <b>INTRODUCTION</b>               |         |                                                                                                                                                                                                                               |      |
| Rationale                         | 6       | Describe the rationale for the review in the context of what is already known                                                                                                                                                 | 5-6  |
| Objectives                        | 7       | Provide an explicit statement of the question(s) the review will address with reference to participants, interventions, comparators, and outcomes (PICO)                                                                      | 6-7  |
| <b>METHODS</b>                    |         |                                                                                                                                                                                                                               |      |
| Eligibility criteria              | 8       | Specify the study characteristics (such as PICO, study design, setting, time frame) and report characteristics (such as years considered, language, publication status) to be used as criteria for eligibility for the review | 7    |
| Information sources               | 9       | Describe all intended information sources (such as electronic databases, contact with study authors, trial registers or other grey literature sources) with planned dates of coverage                                         | 9-10 |
| Search strategy                   | 10      | Present draft of search strategy to be used for at least one electronic database, including planned limits, such that it could be repeated                                                                                    | 9-10 |

|                                    |     |                                                                                                                                                                                                                                                  |       |
|------------------------------------|-----|--------------------------------------------------------------------------------------------------------------------------------------------------------------------------------------------------------------------------------------------------|-------|
| Study records:                     |     |                                                                                                                                                                                                                                                  |       |
| Data management                    | 11a | Describe the mechanism(s) that will be used to manage records and data throughout the review                                                                                                                                                     | 10-11 |
| Selection process                  | 11b | State the process that will be used for selecting studies (such as two independent reviewers) through each phase of the review (that is, screening, eligibility and inclusion in meta-analysis)                                                  | 10    |
| Data collection process            | 11c | Describe planned method of extracting data from reports (such as piloting forms, done independently, in duplicate), any processes for obtaining and confirming data from investigators                                                           | 9-10  |
| Data items                         | 12  | List and define all variables for which data will be sought (such as PICO items, funding sources), any pre-planned data assumptions and simplifications                                                                                          | 8     |
| Outcomes and prioritization        | 13  | List and define all outcomes for which data will be sought, including prioritization of main and additional outcomes, with rationale                                                                                                             | 8     |
| Risk of bias in individual studies | 14  | Describe anticipated methods for assessing risk of bias of individual studies, including whether this will be done at the outcome or study level, or both; state how this information will be used in data synthesis                             | 10    |
| Data synthesis                     | 15a | Describe criteria under which study data will be quantitatively synthesised                                                                                                                                                                      | 10-11 |
|                                    | 15b | If data are appropriate for quantitative synthesis, describe planned summary measures, methods of handling data and methods of combining data from studies, including any planned exploration of consistency (such as $I^2$ , Kendall's $\tau$ ) | 10-11 |
|                                    | 15c | Describe any proposed additional analyses (such as sensitivity or subgroup analyses, meta-regression)                                                                                                                                            | 8     |
|                                    | 15d | If quantitative synthesis is not appropriate, describe the type of summary planned                                                                                                                                                               | N/A   |
| Meta-bias(es)                      | 16  | Specify any planned assessment of meta-bias(es) (such as publication bias across studies, selective reporting within studies)                                                                                                                    | 10-11 |
| Confidence in cumulative evidence  | 17  | Describe how the strength of the body of evidence will be assessed (such as GRADE)                                                                                                                                                               | 10-11 |

**\* It is strongly recommended that this checklist be read in conjunction with the PRISMA-P Explanation and Elaboration (cite when available) for important clarification on the items. Amendments to a review protocol should be tracked and dated. The copyright for PRISMA-P (including checklist) is held by the PRISMA-P Group and is distributed under a Creative Commons Attribution Licence 4.0.**

*From: Shamseer L, Moher D, Clarke M, Ghersi D, Liberati A, Petticrew M, Shekelle P, Stewart L, PRISMA-P Group. Preferred reporting items for systematic review and meta-analysis protocols (PRISMA-P) 2015: elaboration and explanation. BMJ. 2015 Jan 2;349(jan02 1):g7647.*

# BMJ Open

## A Prospective Meta-Analysis Protocol on Randomised Trials of Renin-Angiotensin-System Inhibitors in Patients with Coronavirus Disease-19 (COVID-19): An initiative of the International Society of Hypertension.

|                                 |                                                                                                                                                                                                                                                                                                                                                                                                                                                                                                                                                                                                                                                                                                                                                                                                                                                                                                                                                                                                                                                                                                                                                                                                                                                                                                                                                                                                              |
|---------------------------------|--------------------------------------------------------------------------------------------------------------------------------------------------------------------------------------------------------------------------------------------------------------------------------------------------------------------------------------------------------------------------------------------------------------------------------------------------------------------------------------------------------------------------------------------------------------------------------------------------------------------------------------------------------------------------------------------------------------------------------------------------------------------------------------------------------------------------------------------------------------------------------------------------------------------------------------------------------------------------------------------------------------------------------------------------------------------------------------------------------------------------------------------------------------------------------------------------------------------------------------------------------------------------------------------------------------------------------------------------------------------------------------------------------------|
| Journal:                        | <i>BMJ Open</i>                                                                                                                                                                                                                                                                                                                                                                                                                                                                                                                                                                                                                                                                                                                                                                                                                                                                                                                                                                                                                                                                                                                                                                                                                                                                                                                                                                                              |
| Manuscript ID                   | bmjopen-2020-043625.R1                                                                                                                                                                                                                                                                                                                                                                                                                                                                                                                                                                                                                                                                                                                                                                                                                                                                                                                                                                                                                                                                                                                                                                                                                                                                                                                                                                                       |
| Article Type:                   | Protocol                                                                                                                                                                                                                                                                                                                                                                                                                                                                                                                                                                                                                                                                                                                                                                                                                                                                                                                                                                                                                                                                                                                                                                                                                                                                                                                                                                                                     |
| Date Submitted by the Author:   | 22-Oct-2020                                                                                                                                                                                                                                                                                                                                                                                                                                                                                                                                                                                                                                                                                                                                                                                                                                                                                                                                                                                                                                                                                                                                                                                                                                                                                                                                                                                                  |
| Complete List of Authors:       | Gnanenthiran, Sonali; The George Institute for Global Health, ; Concord Hospital,<br>Borghi, Claudio; S.Orsola Malpighi University Hospital, Department of Medical and Surgical Sciences<br>Burger, Dylan; Kidney Research Centre, Ottawa Hospital Research Institute, Department of Cellular and Molecular Medicine, University of Ottawa<br>Charchar, Fadi; Federation University Australia,<br>Poulter, Neil; Imperial Clinical Trials Unit, Imperial College London<br>Schlaich, Markus P.; University of Western Australia, Medical School<br>Steckelings, Ulrike; Department of Cardiovascular and Renal Research, University of Southern Denmark<br>Stergiou, George; Third University, Hypertension Center STRIDE-7<br>Tomaszewski, Maciej; Division of Medicine and Manchester Academic Health Science Centre, Manchester University NHS Foundation Trust Manchester<br>Unger, Thomas; Maastricht University, CARIM – School for Cardiovascular Diseases<br>Wainford, Richard; Boston University, Department of Pharmacology and Experimental Therapeutics and the Whitaker Cardiovascular Institute, Boston University School of Medicine<br>Williams, Bryan; University College London, Institute of Cardiovascular Science;<br>Rodgers, Anthony; The George Institute for Global Health, Sydney Medical School, University of Sydney,<br>Schutte, Aletta; The George Institute for Global Health |
| <b>Primary Subject Heading</b>: | Cardiovascular medicine                                                                                                                                                                                                                                                                                                                                                                                                                                                                                                                                                                                                                                                                                                                                                                                                                                                                                                                                                                                                                                                                                                                                                                                                                                                                                                                                                                                      |
| Secondary Subject Heading:      | Infectious diseases                                                                                                                                                                                                                                                                                                                                                                                                                                                                                                                                                                                                                                                                                                                                                                                                                                                                                                                                                                                                                                                                                                                                                                                                                                                                                                                                                                                          |
| Keywords:                       | CARDIOLOGY, COVID-19, Hypertension < CARDIOLOGY                                                                                                                                                                                                                                                                                                                                                                                                                                                                                                                                                                                                                                                                                                                                                                                                                                                                                                                                                                                                                                                                                                                                                                                                                                                                                                                                                              |
|                                 |                                                                                                                                                                                                                                                                                                                                                                                                                                                                                                                                                                                                                                                                                                                                                                                                                                                                                                                                                                                                                                                                                                                                                                                                                                                                                                                                                                                                              |

1  
2  
3  
4  
5  
6  
7  
8  
9  
10  
11  
12  
13  
14  
15  
16  
17  
18  
19  
20  
21  
22  
23  
24  
25  
26  
27  
28  
29  
30  
31  
32  
33  
34  
35  
36  
37  
38  
39  
40  
41  
42  
43  
44  
45  
46  
47  
48  
49  
50  
51  
52  
53  
54  
55  
56  
57  
58  
59  
60

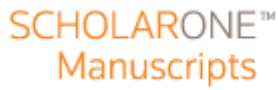

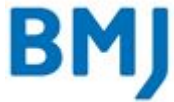

I, the Submitting Author has the right to grant and does grant on behalf of all authors of the Work (as defined in the below author licence), an exclusive licence and/or a non-exclusive licence for contributions from authors who are: i) UK Crown employees; ii) where BMJ has agreed a CC-BY licence shall apply, and/or iii) in accordance with the terms applicable for US Federal Government officers or employees acting as part of their official duties; on a worldwide, perpetual, irrevocable, royalty-free basis to BMJ Publishing Group Ltd ("BMJ") its licensees and where the relevant Journal is co-owned by BMJ to the co-owners of the Journal, to publish the Work in this journal and any other BMJ products and to exploit all rights, as set out in our [licence](#).

The Submitting Author accepts and understands that any supply made under these terms is made by BMJ to the Submitting Author unless you are acting as an employee on behalf of your employer or a postgraduate student of an affiliated institution which is paying any applicable article publishing charge ("APC") for Open Access articles. Where the Submitting Author wishes to make the Work available on an Open Access basis (and intends to pay the relevant APC), the terms of reuse of such Open Access shall be governed by a Creative Commons licence – details of these licences and which [Creative Commons](#) licence will apply to this Work are set out in our licence referred to above.

Other than as permitted in any relevant BMJ Author's Self Archiving Policies, I confirm this Work has not been accepted for publication elsewhere, is not being considered for publication elsewhere and does not duplicate material already published. I confirm all authors consent to publication of this Work and authorise the granting of this licence.

1  
2  
3 **A Prospective Meta-Analysis Protocol on Randomised Trials of Renin-Angiotensin**  
4  
5  
6 **System Inhibitors in Patients with Coronavirus Disease-19 (COVID-19):**  
7  
8 **An initiative of the International Society of Hypertension.**  
9

10  
11  
12  
13 Sonali R Gnanenthiran<sup>1</sup>, Claudio Borghi<sup>2</sup>, Dylan Burger<sup>3</sup>, Fadi Charchar<sup>4</sup>, Neil R Poulter<sup>5</sup>,  
14 Markus Schlaich<sup>6</sup>, Ulrike Muscha Steckelings<sup>7</sup>, George S Stergiou<sup>8</sup>, Maciej Tomaszewski<sup>9</sup>,  
15 Thomas Unger<sup>10</sup>, Richard D Wainford<sup>11</sup>, Bryan Williams<sup>12</sup>, Anthony Rodgers<sup>1</sup>, Aletta E Schutte<sup>1</sup>  
16  
17  
18  
19

- 20  
21  
22 1. The George Institute for Global Health; University of New South Wales, Sydney, NSW,  
23 Australia  
24 2. Department of Medical and Surgical Sciences, University of Bologna, Bologna, Italy  
25 3. Kidney Research Centre, Ottawa Hospital Research Institute, Department of Cellular and  
26 Molecular Medicine, University of Ottawa, Ottawa, Canada  
27 4. School of Health and Life Sciences, Federation University Australia, Ballarat, Victoria,  
28 Australia  
29 5. Imperial Clinical Trials Unit, Imperial College London, United Kingdom  
30 6. Dobney Hypertension Centre, School of Medicine, Royal Perth Hospital Unit, University  
31 of Western Australia, Perth, Australia  
32 7. Department of Cardiovascular and Renal Research, University of Southern Denmark,  
33 Odense, Denmark  
34 8. Hypertension Center STRIDE-7, School of Medicine, Third Department of Medicine,  
35 Sotiria Hospital, National and Kapodistrian University of Athens, Athens, Greece  
36 9. Division of Medicine and Manchester Academic Health Science Centre, Manchester  
37 University NHS Foundation Trust Manchester, United Kingdom  
38 10. CARIM – School for Cardiovascular Diseases, Maastricht University, Maastricht, the  
39 Netherlands  
40 11. Department of Pharmacology and Experimental Therapeutics and the Whitaker  
41 Cardiovascular Institute, Boston University School of Medicine, Massachusetts, USA.  
42 12. Institute of Cardiovascular Science, University College London and National Institute for  
43 Health Research (NIHR) University College London Hospitals Biomedical Research Centre,  
44 London, United Kingdom.  
45  
46  
47  
48  
49  
50

51 **Address for correspondence:**

52 Professor Aletta E Schutte  
53 School of Population Health, University of New South Wales, Kensington Campus, High  
54 Street, Sydney, NSW 2052, Australia  
55 E-mail: [a.schutte@unsw.edu.au](mailto:a.schutte@unsw.edu.au); Tel: +61 450 315 918  
56  
57

58 Word count: 2032  
59  
60



## ABSTRACT

**Introduction:** Whether angiotensin-converting enzyme inhibitors (ACEi) or angiotensin II receptor blocker (ARB) therapy should be continued, initiated or ceased in patients with coronavirus disease 2019 (COVID-19) is uncertain. Given the widespread use of ACEi/ARBs worldwide, guidance on the use of these drugs is urgently needed. This prospective meta-analysis aims to pool data from randomised controlled trials (RCTs) to assess the safety and efficacy of ACEi/ARB therapy in adults infected with severe acute respiratory syndrome coronavirus 2 (SARS-CoV-2).

**Methods and Analysis:** RCTs will be eligible if they compare patients with COVID-19 randomised to ACEi/ARB continuation or commencement versus no ACEi/ARB therapy; study duration  $\geq 14$  days; recruitment completed between March 2020 and May 2021. The primary outcome will be all-cause mortality at  $\leq 30$  days. Secondary outcomes will include mechanical ventilation, admission to intensive care or cardiovascular events at short term follow-up ( $\leq 30$  days), and all-cause mortality at longer term follow-up ( $>1$  month). Pre-specified subgroup analyses will assess the effect of sex; age; comorbidities; smoking status; ethnicity; country of origin on all-cause mortality. A search of ClinicalTrials.gov has been performed, which will be followed by a formal search of trial registers, pre-print servers, MEDLINE, EMBASE and Cochrane Central Register of Controlled Trials to identify RCTs that meet inclusion criteria. To date, a search of ClinicalTrials.gov identified 19 potentially eligible trials for this meta-analysis. We will request trial investigators/sponsors to contribute standardised grouped tabular outcome data.

**Ethics and dissemination:** Ethics approval and informed consent will be the responsibility of the individual RCTs. Dissemination of results will occur by peer-reviewed publication. The

1  
2  
3 results of our analysis can inform public health policy and clinical decision making regarding  
4  
5 ACEi/ARB use in patients with COVID-19 on a global scale.  
6  
7  
8  
9  
10  
11  
12  
13  
14  
15  
16  
17  
18  
19  
20  
21  
22  
23  
24  
25  
26  
27  
28  
29  
30  
31  
32  
33  
34  
35  
36  
37  
38  
39  
40  
41  
42  
43  
44  
45  
46  
47  
48  
49  
50  
51  
52  
53  
54  
55  
56  
57  
58  
59  
60

For peer review only

### STRENGTHS AND LIMITATIONS OF THIS STUDY

- First prospective meta-analysis of randomised controlled trials assessing the safety and efficacy of ACEi/ARBs in adults with coronavirus 2019 disease (COVID-19).
- This meta-analysis uses a collaborative international approach to allow pooling and dissemination of results. This has the potential to inform international public health policy and clinical decision making for ongoing ACEi/ARB use in patients with COVID-19.
- Randomised controlled trials are currently under way with some having the potential to be underpowered. Pooling of data will overcome this shortcoming.
- The completion of these trials prior to data pooling is a limitation, as is the willingness of trialists to collaborate in data sharing.

review only

## INTRODUCTION

Renin-angiotensin system (RAS) inhibitors, including angiotensin-converting enzyme inhibitors (ACEi) and angiotensin II receptor blockers (ARB), are the most widely prescribed anti-hypertensive treatments globally, used by hundreds of millions of people worldwide.<sup>1</sup>

ACEi/ARB therapy are not only first line agents for the treatment of hypertension, but are also the cornerstones of treating cardiovascular and kidney disease such as heart failure, coronary heart disease, diabetes and chronic kidney disease. However, infection with severe acute respiratory syndrome coronavirus-2 (SARS-CoV-2) involves the viral spike protein attaching to the angiotensin-converting enzyme 2 (ACE2) receptor to enter the lungs,<sup>2</sup> with increased binding affinity a key determinant of pathogenicity.<sup>3</sup> Animal studies have demonstrated that ACEi/ARB therapy may upregulate ACE2 receptor expression<sup>4,5</sup> and produce increased cardiac ACE2 mRNA levels, which may promote viral cell invasion.<sup>4,6</sup> Upregulated expression of ACE2 receptors on the cell surface has been postulated to increase the risk of infection with SARS-CoV-2 and the disease severity, with subsequent life-threatening complications.<sup>7,8</sup> At the same time, data from animal studies suggest that increased ACE2 expression secondary to ACEi/ARB use might have protective benefits on cardiac, kidney and pulmonary function and thus reduce the severity of coronavirus disease 2019 (COVID-19).<sup>9</sup>

Observational retrospective studies in humans and meta-analyses of these studies suggest that there is no adverse effect of RAS blockade on COVID-19 severity and outcome,<sup>10-16</sup> but there may be possible protective benefits including reduced rates of mortality,<sup>17</sup> critical disease<sup>15</sup> and admission to intensive care.<sup>18</sup> Observational studies, even rigorous ones, can still have multiple sources of bias, and thus are insufficient for sound clinical decision making. Randomised controlled trials (RCTs) are needed to mitigate this risk. However, to date reliable

1  
2  
3 data from randomised controlled clinical trials are unavailable to guide clinical decision-  
4 making. As a result, it is uncertain whether ACEi/ARB therapy should be continued,  
5  
6 withdrawn, or initiated in patients with COVID-19.  
7  
8  
9

10  
11  
12 International hypertension, cardiovascular and nephrology societies have consistently  
13 recommended that patients continue ACEi/ARB therapy during the COVID-19 pandemic, on  
14 the basis of the strong and well-documented evidence on their protective effects, but identify  
15 a need for more reliable human data.<sup>19-23</sup> There are multiple RCTs in process, which will better  
16 inform clinical decision making rather than relying on observational human studies<sup>10-14</sup> and  
17 inconsistent animal data.<sup>4 6</sup> Most of the RCTs under way are small to moderate in size (~40%  
18 aim to recruit less than 250 participants), with many unlikely to meet their recruitment  
19 targets. These trials are also unlikely to be powered to answer questions regarding subgroup  
20 populations, including whether there is utility of ACEi/ARB therapy in patients with COVID-19  
21 with concomitant hypertension, cardiovascular or renal disease. Given the uncertainty of  
22 ACEi/ARB use in those with COVID-19, some trials are starting ACEi/ARB therapy for possible  
23 benefit, while other trials are stopping the same therapy due to concerns about harm. These  
24 RCTs are not completely free from bias, but nevertheless represent a higher quality of  
25 evidence than observational studies. A prospective meta-analysis led by the International  
26 Society of Hypertension will therefore be an ideal approach to address these limitations, as  
27 well as promoting international collaboration. This approach entails studies to be identified,  
28 evaluated, and determined to be eligible before the results of any included studies are known  
29 or published, thereby avoiding some of the potential biases inherent in standard,  
30 retrospective meta-analyses.  
31  
32  
33  
34  
35  
36  
37  
38  
39  
40  
41  
42  
43  
44  
45  
46  
47  
48  
49  
50  
51  
52  
53  
54  
55  
56  
57  
58  
59  
60

## OBJECTIVES

We will therefore perform a prospective meta-analysis of RCTs recruiting patients with COVID-19 to assess the safety and efficacy of ACEi/ARB therapy compared to those not on ACEi/ARBs. As primary outcome, pooled data will be used to assess all-cause mortality associated with ACEi/ARB therapy compared to those not on ACEi/ARBs stratified by age, co-morbidity, sex, ethnicity, and trial characteristics.

## METHODS AND ANALYSIS

### Protocol Design

For this meta-analysis, we will only include RCTs to minimise the impact of bias and confounding. We herewith describe our methods as per the Preferred Reporting Items for Systematic Review and Meta-Analysis for protocol (PRISMA) recommendations.<sup>24</sup> Final reporting of this study will be compliant with the main PRISMA statement.

### Eligibility Criteria

For clinical trials to be eligible for inclusion, the following criteria must be met: (i) RCTs recruiting between March 2020 and March 2021; (ii) aged  $\geq 18$  years; (iii) laboratory confirmed SARS-CoV-2 infection; (iv) comparison of patients randomised to ACEi/ARB versus no ACEi/ARB therapy; (v) findings reported in English; (vi) trial duration  $\geq 14$  days; (viii) oral administration of ACEi/ARB therapies.

We will include trials that investigate continuation versus cessation of ACEi/ARB among patients currently treated with ACEi/ARB; and trials that report initiation of ACEi/ARB versus control in those not currently treated with such therapies. These are essentially the same

1  
2  
3 randomisations, and so can be pooled in an ACEi/ARB vs. no ACEi/ARB meta-analysis, with  
4 appropriate prespecification of preplanned analyses from the two groups of trials. Studies  
5  
6 must contain sufficient detail and be able to provide at least one outcome outlined within our  
7  
8 data extraction form (Table 1) and be reported using an intention to treat basis. The exclusion  
9  
10  
11  
12  
13 criteria will be at the discretion of each individual trial.  
14  
15  
16  
17

18 The intervention will comprise continuation or initiation of ACEi/ARB therapy. The control will  
19  
20 be discontinuation of current ACEi/ARB therapy, substitution with an equivalent dose of non-  
21  
22 ACEi/ARB therapy, placebo or usual care.  
23  
24  
25  
26  
27

### 28 **Outcomes**

29  
30 The primary outcome will be all-cause mortality at  $\leq 30$  days. Secondary outcomes will include  
31  
32 mechanical ventilation at  $\leq 30$  days; admission to intensive care at  $\leq 30$  days; myocardial  
33  
34 infarction at  $\leq 30$  days, revascularisation at  $\leq 30$  days, congestive cardiac failure at  $\leq 30$  days;  
35  
36 pulmonary embolism and/or deep vein thrombosis at  $\leq 30$  days, hospitalisation at  $\leq 30$  days  
37  
38 and acute kidney injury at  $\leq 30$  days; all-cause mortality at  $>1$  month follow-up. Standardised  
39  
40 grouped tabular de-identified data will be requested from trialists for both short-term ( $\leq 30$   
41  
42 days) and longer term ( $>1$  month) follow up where available (Table 1). Individual identifiable  
43  
44 patient data will not be requested.  
45  
46  
47  
48  
49  
50  
51

52 There is heterogeneity in trial inclusion criteria, which may affect the meta-analysis findings  
53  
54 and be a source of bias. Therefore, subgroup analyses will be performed depending on data  
55  
56 availability, but will aim to assess all-cause mortality at  $\leq 30$  days and  $>1$  month for the  
57  
58 following subgroups: (i) sex: male versus female; (ii) age:  $<60$  years versus  $\geq 60$  years; (iii)  
59  
60

1  
2  
3 comorbidities: hypertension versus no hypertension, diabetes versus no diabetes, chronic  
4 kidney disease (CKD) defined as eGFR<60 mL/min/1.73m<sup>2</sup> versus no CKD, cardiovascular  
5 disease (CVD) [defined as established coronary artery disease, heart failure, arrhythmia and/or  
6 stroke] versus no CVD, chronic obstructive pulmonary disease versus no chronic obstructive  
7 pulmonary disease; (iv) smoking status: ever smoked versus non-smokers; (v) hospitalisation  
8 status: hospitalised versus non-hospitalised patients; (vi) ethnicity: White, South-East/East  
9 Asian, South Asian, African and Other; (vii) trial type: randomised trials that investigate  
10 continuation and cessation of ACEi/ARBs among patients currently treated with ACEi/ARBs,  
11 versus trials that investigate initiation of ACEi/ARBs in those not currently treated with such  
12 therapies compared to control; (viii) region: Americas, Europe, Africa, South and West  
13 Asia/Middle East, and North Asia/South-East Asia/Oceania; (ix) ACEi and ARB separately if  
14 feasible as pooling ACEi and ARB together does not account for within-class differences.; (x)  
15 follow-up period: final short term follow-up 14 days compared to final follow-up at 28-30  
16 days; (x) asymptomatic vs symptomatic clinical status (Supplemental Tables 1 and 2).

### Search strategy and searching sources

17  
18  
19  
20  
21  
22  
23  
24  
25  
26  
27  
28  
29  
30  
31  
32  
33  
34  
35  
36  
37  
38  
39  
40  
41  
42 An electronic search of ClinicalTrial.gov was performed to identify potential ongoing trials for  
43 inclusion in the meta-analysis. Figure 1 summarises the trial search as of July 2020 performed  
44 using the search terms: coronavirus 2019, COVID-19, SARS-CoV-2, randomised controlled  
45 trial, ACEi and/or ARB. A total of 19 trials were identified which potentially met the eligibility  
46 criteria (Figure 1, Table 2). Of these, 5 trials evaluated the continuation of ACEi/ARB therapies  
47 in those already on such therapies compared to discontinuation, and 14 trials involved  
48 initiation of ACEi/ARB therapies in those not on such therapies. Nine trials did not meet  
49 inclusion criteria due to (a) not assessing ACEi/ARB therapies (n=4), (b) absence of a control  
50  
51  
52  
53  
54  
55  
56  
57  
58  
59  
60



1  
2  
3 group (n=2), (c) use of non-oral administration of ACEi/ARB therapies (n=2), or (d) recruitment  
4  
5 of patients with active malignancy (n=1). We extracted information about eligible  
6  
7 investigators to invite them to participate in the prospective meta-analysis by contributing  
8  
9 tabular data. An invitation letter will be sent via email and will include details about the study  
10  
11 protocol, offer of authorship, identification of the time for data retrieval and confirmation of  
12  
13 data security.  
14  
15  
16  
17  
18  
19

20 This search will be continuously updated, and investigators of newly reported and eligible  
21  
22 trials will be invited to join the collaboration. Using the Cochrane Collaboration guidelines,<sup>25</sup>  
23  
24 electronic searches of MEDLINE (1996–present), EMBASE (1996–present) and the Cochrane  
25  
26 Central Register of Controlled Trials (most recent edition) will also be performed to identify  
27  
28 any other RCTs that meet inclusion criteria in March 2021. A comprehensive search strategy  
29  
30 using MeSH terms and text words will be used (Supplemental Table 3). Two investigators (SG  
31  
32 and AES) will screen the abstracts for potential inclusion against the eligibility criteria, and  
33  
34 screen the full texts. Reference management software (EndNote) will be used to store  
35  
36 identified records.  
37  
38  
39  
40  
41  
42  
43  
44

45 All provided data will be stored on a password protected server, with limited access only to  
46  
47 those directly involved in data analysis.  
48  
49  
50

## 51 **Study Evaluation**

52 A quality assessment of each RCT will be performed independently by two authors (SRG, AES),  
53  
54 with disagreements resolved by discussion. This will include evaluation of allocation  
55  
56 sequence, allocation concealment, blinding, loss to follow-up, and completeness of outcome  
57  
58  
59  
60

1  
2  
3 reporting.<sup>25</sup> Randomisation procedures, treatment allocation according to assignment,  
4  
5 outcomes collected and compared across groups; blinding methods; and risk of bias both at  
6  
7 study and outcome levels will also be assessed using the Cochrane Risk of Bias Tool.<sup>26</sup> Two  
8  
9 investigators (SG and AES) will independently review the articles and any disagreements will  
10  
11 be adjudicated by a third independent investigator (AR).  
12  
13  
14  
15  
16  
17

### 18 **Statistical Analysis**

19  
20 Trial-specific outcome data will be pooled. For binary outcomes, risk ratios and 95% CI will be  
21  
22 estimated using log-binomial mixed-effects models (or odds ratios from logistic models as  
23  
24 required). Key results will be presented using Forest plots, and the  $I^2$  statistic will be used to  
25  
26 quantify the degree of heterogeneity between studies.<sup>27</sup> A two-tailed p-value of 5% will be  
27  
28 used for hypothesis testing. A fixed effects analysis will be used unless there is significant  
29  
30 heterogeneity (as evidenced by  $I^2 > 70\%$  and quantitatively large variation), in which case  
31  
32 pooling will not be performed.<sup>28</sup> Publication bias will be assessed by visual inspection of  
33  
34 funnel plots and formally using Egger's method to evaluate the tendency of publishing studies  
35  
36 with statistically significant findings.<sup>29</sup> We will use meta-regression analyses to further explore  
37  
38 heterogeneity of treatment effects if considerable residual heterogeneity remains after  
39  
40 controlling for variables. Analyses will also be stratified by the prespecified subgroup analysis  
41  
42 as mentioned above. In general, reporting of the findings will follow PRISMA guidelines.<sup>24</sup> All  
43  
44 analyses will be conducted using Review Manager 5.3 software (Copenhagen, The Nordic  
45  
46 Cochrane Centre, The Cochrane Collaboration, 2014).  
47  
48  
49  
50  
51  
52  
53  
54  
55  
56

### 57 **Data Statement**

58  
59  
60

1  
2  
3 We will not have access to identifiable patient information. All data sharing and storage  
4  
5 procedures will be compliant with the Australian Data Privacy Act of 1988. All trial data will  
6  
7 be considered confidential and will not be provided to any third party. Data will be stored on  
8  
9 site at The George Institute for Global Health, King St Campus, Sydney, Australia, with strict  
10  
11 confidentiality and comprehensive data security.  
12  
13  
14  
15  
16  
17

### 18 **Ethics and dissemination**

19  
20 All individual trials will require Ethics Committee or Institution Review Board approval. We  
21  
22 will publish our findings in peer-reviewed medical journals. Publications will be in the name  
23  
24 of the collaborative group involving all trialists who provided data. Further, we will share and  
25  
26 present our findings at scientific meetings and through the networks and memberships across  
27  
28 professional societies.  
29  
30  
31  
32  
33  
34

### 35 **Implications of the review**

36  
37 Given the widespread use of ACEi and ARBs worldwide, guidance on the use of ACEi/ARBs in  
38  
39 adults with COVID-19 is urgently needed, relying on evidence beyond observational data. This  
40  
41 collaborative international approach will allow dissemination of results, which will inform  
42  
43 public health policy and clinical decision making for ongoing ACEi/ARBs use on an  
44  
45 international scale. Healthcare providers and policy-makers can use the findings to improve  
46  
47 the clinical decision making by developing strategies and guidelines to guide use of ACEi/ARBs  
48  
49 in hypertension, cardiovascular disease and kidney disease.  
50  
51  
52  
53  
54  
55  
56

### 57 **Patient and public involvement**

1  
2  
3 Patients were not involved in the development of the research question, outcome measure  
4  
5 and study design.  
6  
7  
8  
9  
10  
11  
12  
13  
14  
15  
16  
17  
18  
19  
20  
21  
22  
23  
24  
25  
26  
27  
28  
29  
30  
31  
32  
33  
34  
35  
36  
37  
38  
39  
40  
41  
42  
43  
44  
45  
46  
47  
48  
49  
50  
51  
52  
53  
54  
55  
56  
57  
58  
59  
60

For peer review only

1  
2  
3  
4  
5  
6  
7  
8  
9  
10  
11  
12  
13  
14  
15  
16  
17  
18  
19  
20  
21  
22  
23  
24  
25  
26  
27  
28  
29  
30  
31  
32  
33  
34  
35  
36  
37  
38  
39  
40  
41  
42  
43  
44  
45  
46  
47  
48  
49  
50  
51  
52  
53  
54  
55  
56  
57  
58  
59  
60  
**REFERENCES**

1. Gu Q, Burt VL, Dillon CF, Yoon S. Trends in antihypertensive medication use and blood pressure control among United States adults with hypertension: the National Health And Nutrition Examination Survey, 2001 to 2010. *Circulation* 2012;126(17):2105-14.
2. Li W, Moore MJ, Vasilieva N, Sui J, Wong SK, Berne MA, Somasundaran M, Sullivan JL, Luzuriaga K, Greenough TC, Choe H, Farzan M. Angiotensin-converting enzyme 2 is a functional receptor for the SARS Coronavirus. *Nature* 2003;426(6965):450-54.
3. Hoffmann M, Kleine-Weber H, Schroeder S, Krüger N, Herrler T, Erichsen S, Schiergens TS, Herrler G, Wu NH, Nitsche A, Müller MA, Drosten C, Pöhlmann S. SARS-CoV-2 cell entry depends on ACE2 and TMPRSS2 and is blocked by a clinically proven protease inhibitor. *Cell* 2020;181(2):271-80.
4. Ferrario CM, Jessup J, Chappell MC, Averill DB, Brosnihan KB, Tallant EA, Diz DI, Gallagher PE. Effect of angiotensin-converting enzyme inhibition and angiotensin II receptor blockers on cardiac angiotensin-converting enzyme 2. *Circulation* 2005;111(20):2605-10.
5. Igase M, Kohara K, Nagai T, Miki T, Ferrario CM. Increased expression of angiotensin converting enzyme 2 in conjunction with reduction of neointima by angiotensin II type 1 receptor blockade. *Hypertens Res* 2008;31(3):553-9.
6. Ocaranza MP, Moya J, Barrientos V, Alzamora R, Hevia D, Morales C, Pinto M, Escudero N, García L, Novoa U, Ayala P, Díaz-Araya G, Godoy I, Chiong M, Lavandero S, Jalil JE, Michea L. Angiotensin-(1-9) reverses experimental hypertension and cardiovascular damage by inhibition of the angiotensin converting enzyme/Ang II Axis. *J Hypertens* 2014;32(4):771-83.

- 1  
2  
3 7. Fang L, Karakiulakis G, Roth M. Are patients with hypertension and diabetes mellitus at  
4  
5 increased risk for COVID-19 infection? *Lancet Resp Med* 2020;8(4):e21.  
6  
7
- 8 8. Sommerstein R, Grani C. Preventing a COVID-19 pandemic: ACE inhibitors as a potential risk  
9  
10 factor for fatal COVID-19. *BMJ* 2020;368:m810.  
11  
12
- 13 9. Sparks MA, South A, Welling P, Luther M, Cohen J, Byrd JB, Burrell L, Batlle D, Tomlinson L,  
14  
15 Bhalla V, Rheault MN, Soler MJ, Swaminathan S, Hiremath S. Sound science before  
16  
17 quick judgement regarding RAS blockade in COVID-19. *Clin J Am Soc Nephrol* 2020;  
18  
19 7(15):714-16.  
20  
21
- 22 10. de Abajo FJ, Rodriguez-Martin S, Lerma V, Mejía-Abril G, Aguilar M, García-Luque A,  
23  
24 Laredo L, Laosa O, Centeno-Soto GA, Ángeles Gálvez M, Puerro M, González-Rojano E,  
25  
26 Pedraza L, de Pablo I, Abad-Santos F, Rodríguez-Mañas L, Gil M, Tobías A, Rodríguez-  
27  
28 Miguel A, Rodríguez-Puyol D; MED-ACE2-COVID19 study group. Use of renin-  
29  
30 angiotensin-aldosterone system inhibitors and risk of COVID-19 requiring admission  
31  
32 to hospital: a case-population study. *Lancet* 2020;395(10238):1705-14.  
33  
34  
35  
36
- 37 11. Jung SY, Choi JC, You SH, Kim WY. Association of renin-angiotensin-aldosterone system  
38  
39 inhibitors with COVID-19-related outcomes in Korea: a nationwide population-based  
40  
41 cohort study. *Clin Infect Dis* 2020;Epub ahead of print. DOI 10.1093/cid/ciaa624  
42  
43  
44
- 45 12. Li J, Wang X, Chen J, Zhang H, Deng A. Association of renin-angiotensin system inhibitors  
46  
47 with severity or risk of death in patients with hypertension hospitalized for  
48  
49 coronavirus disease 2019 (COVID-19) infection in Wuhan, China. *JAMA Cardiol* 2020;  
50  
51 5(7):825-830.  
52  
53
- 54 13. Mancia G, Rea F, Ludergrani M, Apolone G, Corrao G. Renin-angiotensin-aldosterone  
55  
56 system blockers and the risk of COVID-19. *N Engl J Med* 2020;382(25):2431-40.  
57  
58  
59  
60

- 1  
2  
3  
4  
5  
6  
7  
8  
9  
10  
11  
12  
13  
14  
15  
16  
17  
18  
19  
20  
21  
22  
23  
24  
25  
26  
27  
28  
29  
30  
31  
32  
33  
34  
35  
36  
37  
38  
39  
40  
41  
42  
43  
44  
45  
46  
47  
48  
49  
50  
51  
52  
53  
54  
55  
56  
57  
58  
59  
60
14. Reynolds HR, Adhikari S, Pulgarin C, Troxel AB, Iturrate E, Johnson SB, Hausvater A, Newman JD, Berger JS, Bangalore S, Katz SD, Fishman GI, Kunichoff D, Chen Y, Ogedegbe G, Hochman JS. Renin-angiotensin-aldosterone system inhibitors and risk of COVID-19. *N Engl J Med* 2020;382(25):2441-48.
  15. Pirola CJ, Sookoian S. Estimation of Renin-Angiotensin-Aldosterone-System (RAAS)-Inhibitor Effect on COVID-19 Outcome: A Meta-analysis. *J Infect* 2020;S0163-4453(20):30329-7.
  16. Guo X, Zhu Y, Hong Y. Decreased Mortality of COVID-19 With Renin-Angiotensin-Aldosterone System Inhibitors Therapy in Patients With Hypertension: A Meta-Analysis. *Hypertension* 2020;76(2):e13-e14.
  17. Zhang P, Zhu L, Cai J, Lei F, Qin JJ, Xie J, Liu YM, Zhao YC, Huang X, Lin L, Xia M, Chen MM, Cheng X, Zhang X, Guo D, Peng Y, Ji YX, Chen J, She ZG, Wang Y, Xu Q, Tan R, Wang H, Lin J, Luo P, Fu S, Cai H, Ye P, Xiao B, Mao W, Liu L, Yan Y, Liu M, Chen M, Zhang XJ, Wang X, Touyz RM, Xia J, Zhang BH, Huang X, Yuan Y, Loomba R, Liu PP, Li H. Association of inpatient use of angiotensin-converting enzyme inhibitors and angiotensin II receptor blockers with mortality among patients with hypertension hospitalized with COVID-19. *Circ Res* 2020;126(12):1671-81.
  18. Felice C, Nardin C, Di Tanna GL, Grossi U, Bernardi E, Scaldaferrri L, Romagnoli M, Tonon L, Cavasin P, Novello S, Scarpa R, Farnia A, De Menis E, Rigoli R, Cinetto F, Pauletto P, Agostini C, Rattazzi M. Use of RAAS inhibitors and risk of clinical deterioration in COVID-19: results from an Italian cohort of 133 hypertensives. *Am J Hypertens* 2020; epub ahead of print. DOI 10.1093/ajh/hpaa096

- 1  
2  
3  
4  
5  
6  
7  
8  
9  
10  
11  
12  
13  
14  
15  
16  
17  
18  
19  
20  
21  
22  
23  
24  
25  
26  
27  
28  
29  
30  
31  
32  
33  
34  
35  
36  
37  
38  
39  
40  
41  
42  
43  
44  
45  
46  
47  
48  
49  
50  
51  
52  
53  
54  
55  
56  
57  
58  
59  
60
19. International Society of Hypertension. Statement on COVID-19. 2020. [Available from: <https://ish-world.com/news/a/A-statement-from-the-International-Society-of-Hypertension-on-COVID-19>. Accessed May 6, 2020]
  20. American College of Cardiology, American Heart Association and Heart Failure Society of America. Patients taking ACE-i and ARBs who contract COVID-19 should continue treatment, unless otherwise advised by their physician 2020. [Available from: <https://www.acc.org/latest-in-cardiology/articles/2020/03/17/08/59/hfsa-acc-aha-statement-addresses-concerns-re-using-raas-antagonists-in-covid-19>. Accessed May 6, 2020]
  21. European Society of Cardiology Council on Hypertension. Position statement of the ESC Council on Hypertension on ACE-inhibitors and angiotensin receptor blockers 2020 [Available from: [https://www.escardio.org/Councils/Council-on-Hypertension-\(CHT\)/News/position-statement-of-the-esc-council-on-hypertension-on-ace-inhibitors-and-ang](https://www.escardio.org/Councils/Council-on-Hypertension-(CHT)/News/position-statement-of-the-esc-council-on-hypertension-on-ace-inhibitors-and-ang). Accessed May 6, 2020]
  22. European Society of Hypertension. Statement on COVID-19 2020. [Available from: <https://www.eshonline.org/spotlights/esh-statement-on-covid-19>. Accessed May 6, 2020]
  23. The Renal Association. UK position statement on COVID-19 and ACE Inhibitor/Angiotensin Receptor Blocker use, 2020. [Available from: <https://renal.org/covid-19/ra-resources-renal-professionals/renal-association-uk-position-statement-covid-19-ace-inhibitorangiotensin-receptor-blocker-use>. Accessed Oct 6, 2020]
  24. Liberati A, Altman DG, Tetzlaff J, Mulrow C, Gøtzsche PC, Ioannidis JPA, Clarke M, Devereaux PJ, Kleijnen J, Moher D. The PRISMA statement for reporting systematic



1  
2  
3 reviews and meta-analyses of studies that evaluate healthcare interventions:  
4 explanation and elaboration. *BMJ* 2009;21(339)  
5  
6  
7

- 8 25. Higgins J, Thomas J, Chandler J, Cumpston M, Li T, Page MJ, Welch VA (editors). Cochrane  
9 Handbook for Systematic Reviews of Interventions version 6.0 (updated July 2019):  
10 Cochrane, 2019.  
11  
12  
13  
14  
15 26. Higgins JP, Altman DG, Gotzsche P, Jüni P, Moher D, Oxman AD, Savovic J, Schulz KF, Weeks  
16 L, Sterne JA; Cochrane Bias Methods Group; Cochrane Statistical Methods Group. The  
17 cochrane collaboration's tool for assessing risk of bias in randomised trials. *BMJ*  
18 2011;343:1–9.  
19  
20  
21  
22  
23  
24  
25 27. Higgins JPT, Thompson SG. Quantifying heterogeneity in a meta-analysis. *Stat Med*  
26 2002;21(11):1539–58.  
27  
28  
29  
30 28. Hedges LV, Vevea JL. Fixed- and random-effects models in meta-analysis. *Psychol Methods*  
31 1998;3(4):486–504.  
32  
33  
34  
35 29. Egger M, Davey Smith G, Schneider M, Minder C. Bias in meta-analysis detected by a  
36 simple, graphical test. *BMJ* 1997;315(7109):629–34.  
37  
38  
39  
40  
41  
42  
43  
44  
45  
46  
47  
48  
49  
50  
51  
52  
53  
54  
55  
56  
57  
58  
59  
60

1  
2  
3 **Authors' Contributions:** SG, AR and AES were involved in the planning and writing of this  
4  
5 protocol. CB, DB, FC, NRP, MS, UMS, GSS, MT, TU, RDW and BW reviewed the protocol  
6  
7 and provided intellectual input.  
8  
9

10  
11  
12  
13 **Funding Statement:** This research received no specific grant from any funding agency in the  
14  
15 public, commercial or not-for-profit sectors.  
16  
17

18  
19  
20 **Competing Interests Statement:** Nil competing interests.  
21  
22

23  
24  
25 **Acknowledgements:** Stella Galanis, NSW Health librarian  
26  
27  
28  
29  
30  
31  
32  
33  
34  
35  
36  
37  
38  
39  
40  
41  
42  
43  
44  
45  
46  
47  
48  
49  
50  
51  
52  
53  
54  
55  
56  
57  
58  
59  
60

1  
2  
3 **Figure 1: Flowchart of Trial Inclusion**  
4  
5  
6  
7  
8  
9  
10  
11  
12  
13  
14  
15  
16  
17  
18  
19  
20  
21  
22  
23  
24  
25  
26  
27  
28  
29  
30  
31  
32  
33  
34  
35  
36  
37  
38  
39  
40  
41  
42  
43  
44  
45  
46  
47  
48  
49  
50  
51  
52  
53  
54  
55  
56  
57  
58  
59  
60

For peer review only

**Table 1: Outcome Grouped Tabular Data**

|                                                 | <b>NO ACEi/ARB</b> | <b>ACEi/ARB</b> |
|-------------------------------------------------|--------------------|-----------------|
| <b>BASELINE CHARACTERISTICS</b>                 |                    |                 |
| N                                               |                    |                 |
| Mean Age $\pm$ SD (years)                       |                    |                 |
| Sex, n                                          |                    |                 |
| Men                                             |                    |                 |
| Women                                           |                    |                 |
| Past Medical History, n                         |                    |                 |
| Hypertension                                    |                    |                 |
| Diabetes                                        |                    |                 |
| Chronic Kidney Disease                          |                    |                 |
| Cardiovascular disease                          |                    |                 |
| Chronic obstructive pulmonary disease           |                    |                 |
| Smoking                                         |                    |                 |
| Ever-smoked                                     |                    |                 |
| Non-smoker                                      |                    |                 |
| <b>OUTCOMES FOR <math>\leq 30</math> DAYS</b>   |                    |                 |
| <b>Total number of patients in the group, n</b> |                    |                 |
| All-cause mortality                             |                    |                 |
| Myocardial Infarction                           |                    |                 |
| Congestive Cardiac Failure                      |                    |                 |
| Revascularisation                               |                    |                 |
| Admission to Intensive Care Unit                |                    |                 |
| Need for Mechanical ventilation                 |                    |                 |
| Hospitalisation (if outpatient study)           |                    |                 |
| Pulmonary embolism/deep vein thrombosis         |                    |                 |
| Acute kidney injury                             |                    |                 |
| <b>OUTCOMES <math>&gt;1</math> MONTH, n</b>     |                    |                 |
| All-cause mortality                             |                    |                 |

\*N=number, SD standard deviation, ACEi angiotensin-converting enzyme inhibitors, ARB angiotensin II receptor blocker; acute kidney injury: decline in renal function or urine output from baseline.

**Table 2: Potential Eligible Randomised Controlled Trials of Adults with COVID-19**

| COUNTRY                                                              | CLINICAL TRIALS.GOV NUMBER | TREATMENT GROUP        | COMPARISON GROUP                  | SAMPLE SIZE | FOLLOW UP |
|----------------------------------------------------------------------|----------------------------|------------------------|-----------------------------------|-------------|-----------|
| Pennsylvania, USA                                                    | NCT04338009                | Continue ACEi/ARB      | Discontinue ACEi/ARB              | 152         | 28 days   |
| Paris, France                                                        | NCT04329195                | Continue ACEi/ARB      | Discontinue ACEi/ARB              | 554         | 28 days   |
| Sao Paulo, Brazil                                                    | NCT04364893                | Continue ACEi/ARB      | Discontinue ACEi/ARB              | 500         | 30 days   |
| Copenhagen, Denmark                                                  | NCT04351581                | Continue ACEi/ARB      | Discontinue ACEi/ARB              | 215         | 30 days   |
| Munich, Germany; Innsbruck, Austria                                  | NCT04353596                | Continue ACEi/ARB      | Discontinue ACEi/ARB              | 208         | 30 days   |
| Tanta, Egypt                                                         | NCT04345406                | Captopril or enalapril | Placebo                           | 60          | 6 months  |
| Vienna and Innsbruck, Austria                                        | NCT04351724                | Candesartan            | Non-RAS blockade/standard of care | 500*        | 29 days   |
| Minnesota, USA                                                       | NCT04312009                | Losartan               | Placebo                           | 200         | 90 days   |
| Minnesota, USA                                                       | NCT04311177                | Losartan               | Placebo                           | 580         | 28 days   |
| California, USA                                                      | NCT04340557                | Losartan               | Standard care                     | 200         | 45 days   |
| New York, USA                                                        | NCT04328012                | Losartan               | Placebo                           | 4000*       | 60 days   |
| 's-Hertogenbosch, Arnhem, Nijmegen, Roermond, Rotterdam, Netherlands | NCT04335786                | Valsartan              | Placebo                           | 651         | 90 days   |
| San Diego, USA                                                       | NCT04366050                | Ramipril               | Placebo                           | 560         | 14 days   |
| Buenos Aires, Argentina                                              | NCT04355936                | Telmisartan            | Standard care                     | 400         | 90 days   |
| Sydney, Australia                                                    | NCT04394117                | ARB                    | Standard care                     | 605         | 90 days   |
| Oyo, Nigeria; Rawalpindi, Pakistan                                   | NCT04343001                | Losartan               | Standard care                     | 10,000*     | 28 days   |
| Hawaii, USA                                                          | NCT04360551                | Telmisartan            | Placebo                           | 40          | 21 days   |
| Bordeaux, France                                                     | NCT04356495                | Telmisartan            | Control (vitamins)                | 1057*       | 28 days   |
| Strasbourg, France                                                   | NCT04359953                | Telmisartan            | Standard care                     | 1600*       | 28 days   |

\* Sample size consists of multiple trial arms including non-ACEi/ARB therapies or non-control groups

RAS, renin-angiotensin system; ACEi, angiotensin-converting enzyme inhibitors; ARB, angiotensin II receptor blockers; BP, blood pressure

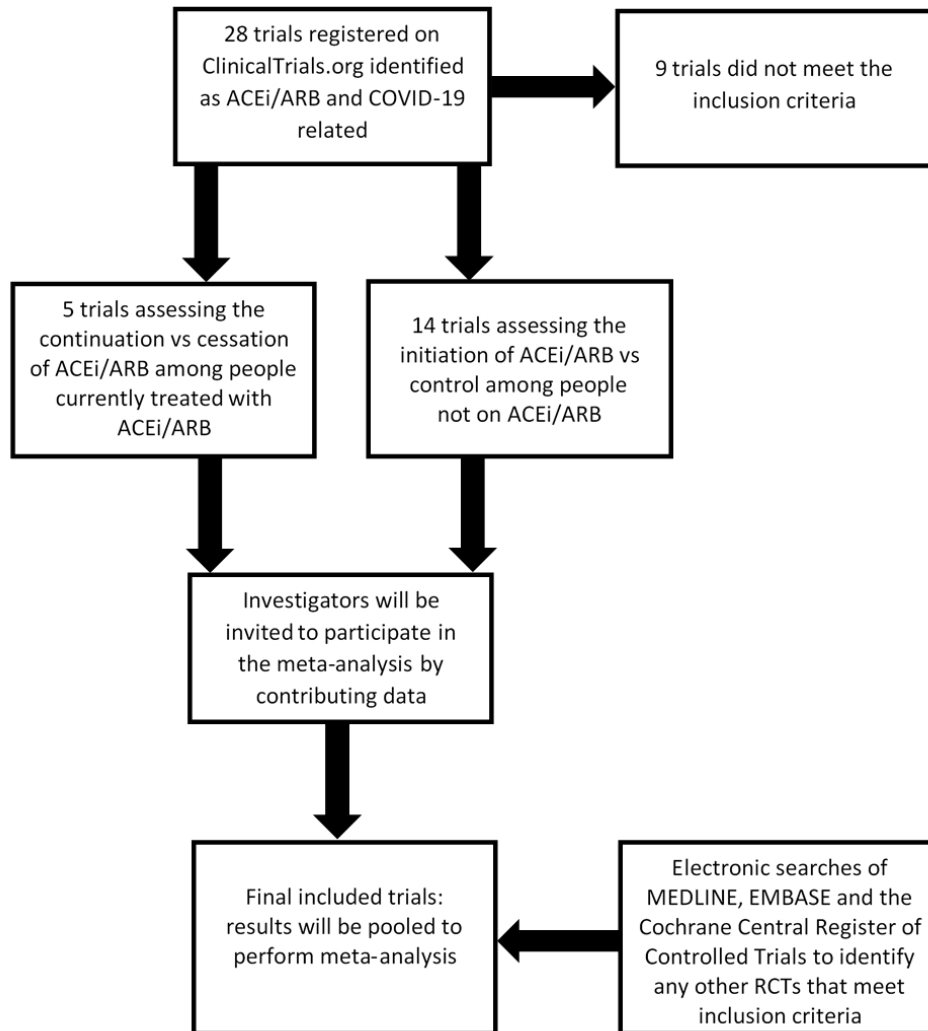

Figure 1: Flowchart of Trial Inclusion

173x208mm (144 x 144 DPI)

1  
2  
3 **A Prospective Meta-Analysis Protocol on Randomised Trials of Renin-Angiotensin-**  
4  
5  
6 **System Inhibitors in Patients with Coronavirus Disease-19 (COVID-19):**  
7  
8 **An initiative of the International Society of Hypertension.**  
9

10  
11  
12  
13 **Supplemental Data**  
14

15  
16 Sonali R Gnanenthiran<sup>1</sup>, Claudio Borghi<sup>2</sup>, Dylan Burger<sup>3</sup>, Fadi Charchar<sup>4</sup>, Neil R Poulter<sup>5</sup>,  
17 Markus Schlaich<sup>6</sup>, Ulrike Muscha Steckelings<sup>7</sup>, George S Stergiou<sup>8</sup>, Maciej Tomaszewski<sup>9</sup>,  
18 Thomas Unger<sup>10</sup>, Richard D Wainford<sup>11</sup>, Bryan Williams<sup>12</sup>, Anthony Rodgers<sup>1</sup>, Aletta E Schutte<sup>1</sup>  
19  
20  
21

- 22  
23  
24 1. The George Institute for Global Health, University of New South Wales, Sydney, NSW,  
25 Australia  
26 2. Department of Medical and Surgical Sciences, University of Bologna, Bologna, Italy  
27 3. Kidney Research Centre, Ottawa Hospital Research Institute, Department of Cellular and  
28 Molecular Medicine, University of Ottawa, Ottawa, Canada  
29 4. School of Health and Life Sciences, Federation University Australia, Ballarat, Victoria,  
30 Australia  
31 5. Imperial Clinical Trials Unit, Imperial College London, United Kingdom  
32 6. Dobney Hypertension Centre, School of Medicine, Royal Perth Hospital Unit, University  
33 of Western Australia, Perth, Australia  
34 7. Department of Cardiovascular and Renal Research, University of Southern Denmark,  
35 Odense, Denmark  
36 8. Hypertension Center STRIDE-7, School of Medicine, Third Department of Medicine,  
37 Sotiria Hospital, National and Kapodistrian University of Athens, Athens, Greece  
38 9. Division of Medicine and Manchester Academic Health Science Centre, Manchester  
39 University NHS Foundation Trust Manchester, United Kingdom  
40 10. CARIM – School for Cardiovascular Diseases, Maastricht University, Maastricht, the  
41 Netherlands  
42 11. Department of Pharmacology and Experimental Therapeutics and the Whitaker  
43 Cardiovascular Institute, Boston University School of Medicine, Massachusetts, USA.  
44 12. Institute of Cardiovascular Science, University College London and National Institute for  
45 Health Research (NIHR) University College London Hospitals Biomedical Research Centre,  
46 London, United Kingdom.  
47  
48  
49  
50  
51  
52  
53  
54  
55  
56  
57  
58  
59  
60

**Supplemental Table 1. Subgroup Analysis for All-Cause Mortality at Short Term Follow up (≤30 days)**

|                           | NO ACEi/ARB group |                       | ACEi/ARB group |                       |
|---------------------------|-------------------|-----------------------|----------------|-----------------------|
|                           | No. of Deaths     | Total no. in subgroup | No. of Deaths  | Total no. in subgroup |
| Sex                       |                   |                       |                |                       |
| Men                       |                   |                       |                |                       |
| Women                     |                   |                       |                |                       |
| Age                       |                   |                       |                |                       |
| <60 years                 |                   |                       |                |                       |
| ≥60 years                 |                   |                       |                |                       |
| Ethnicity                 |                   |                       |                |                       |
| White                     |                   |                       |                |                       |
| South-East/East Asian     |                   |                       |                |                       |
| South Asian               |                   |                       |                |                       |
| African                   |                   |                       |                |                       |
| Other                     |                   |                       |                |                       |
| Comorbidities             |                   |                       |                |                       |
| Hypertension              |                   |                       |                |                       |
| No Hypertension           |                   |                       |                |                       |
| Diabetes Mellitus         |                   |                       |                |                       |
| No Diabetes Mellitus      |                   |                       |                |                       |
| Chronic Kidney Disease    |                   |                       |                |                       |
| No Chronic Kidney Disease |                   |                       |                |                       |
| Cardiovascular Disease    |                   |                       |                |                       |
| No Cardiovascular Disease |                   |                       |                |                       |
| COPD                      |                   |                       |                |                       |
| No COPD                   |                   |                       |                |                       |
| Smoking Status            |                   |                       |                |                       |
| Ever Smoked               |                   |                       |                |                       |
| Non-smoker                |                   |                       |                |                       |

\*ACEi angiotensin converting enzyme inhibitor, ARB angiotensin II receptor blocker, COPD chronic obstructive pulmonary disease



**Supplemental Table 2: Subgroup Analysis for All-Cause Mortality at Longer Term Follow up (>1 month)**

|                           | NO ACEi/ARB group |                       | ACEi/ARB group |                       |
|---------------------------|-------------------|-----------------------|----------------|-----------------------|
|                           | No. of Deaths     | Total no. in subgroup | No. of Deaths  | Total no. in subgroup |
| Sex                       |                   |                       |                |                       |
| Men                       |                   |                       |                |                       |
| Women                     |                   |                       |                |                       |
| Age                       |                   |                       |                |                       |
| <60 years                 |                   |                       |                |                       |
| ≥60 years                 |                   |                       |                |                       |
| Ethnicity                 |                   |                       |                |                       |
| White                     |                   |                       |                |                       |
| South-East/East Asian     |                   |                       |                |                       |
| South Asian               |                   |                       |                |                       |
| African                   |                   |                       |                |                       |
| Other                     |                   |                       |                |                       |
| Comorbidities             |                   |                       |                |                       |
| Hypertension              |                   |                       |                |                       |
| No Hypertension           |                   |                       |                |                       |
| Diabetes Mellitus         |                   |                       |                |                       |
| No Diabetes Mellitus      |                   |                       |                |                       |
| Chronic Kidney Disease    |                   |                       |                |                       |
| No Chronic Kidney Disease |                   |                       |                |                       |
| Cardiovascular Disease    |                   |                       |                |                       |
| No Cardiovascular Disease |                   |                       |                |                       |
| COPD                      |                   |                       |                |                       |
| No COPD                   |                   |                       |                |                       |
| Smoking Status            |                   |                       |                |                       |
| Ever Smoked               |                   |                       |                |                       |
| Non-smoker                |                   |                       |                |                       |

\*ACEi angiotensin converting enzyme inhibitor, ARB angiotensin II receptor blocker, COPD chronic obstructive pulmonary disease

**Supplemental Table 3: Search Strategy**

| MEDLINE                                                  | EMBASE®                                                          | Cochrane Central Register of Controlled Trials                                                                                                                 |
|----------------------------------------------------------|------------------------------------------------------------------|----------------------------------------------------------------------------------------------------------------------------------------------------------------|
| 1. exp angiotensin receptor antagonist/                  | 1. exp angiotensin receptor antagonist/ (91561)                  | 1. covid-19 OR coronavirus 19 OR coronavirus disease : in Title, Abstract                                                                                      |
| 2. "angiotensin converting enzyme inhibitor*".mp.        | 2. "angiotensin converting enzyme inhibitor*".mp. (22027)        | 2. angiotensin receptor antagonist OR angiotensin converting enzyme inhibitor OR angiotensin II receptor blockers OR ACEi OR ARB : in Title, Abstract, Keyword |
| 3. "angiotensin II receptor blocker*".mp.                | 3. "angiotensin II receptor blocker*".mp. (5419)                 | 3. 1 AND 2                                                                                                                                                     |
| 4. "ACEi".ti,ab,kw.                                      | 4. "ACEi".ti,ab,kw. (8009)                                       | 4. COVID in All Text                                                                                                                                           |
| 5. "ARB".ti,ab,kw.                                       | 5. "ARB".ti,ab,kw. (10521)                                       | 5. 3 AND 4                                                                                                                                                     |
| 6. 1 or 2 or 3 or 4 or 5                                 | 6. 1 or 2 or 3 or 4 or 5 (109156)                                | 6. randomized control* trial* or RCT or OR "controlled clinical trial" OR clinical trial as topic                                                              |
| 7. "COVID-19".mp.                                        | 7. "COVID-19".mp. (49866)                                        | 7. 5 AND 6                                                                                                                                                     |
| 8. "coronavirus-19".mp.                                  | 8. "coronavirus-19".mp. (109)                                    |                                                                                                                                                                |
| 9. "severe acute respiratory syndrome coronavirus 2".mp. | 9. "severe acute respiratory syndrome coronavirus 2".mp. (16979) |                                                                                                                                                                |
| 10. "2019-nCoV".mp.                                      | 10. "2019-nCoV".mp. (1158)                                       |                                                                                                                                                                |
| 11. "SARS-CoV-2".mp.                                     | 11. "SARS-CoV-2".mp. (16860)                                     |                                                                                                                                                                |
| 12. "COV-2".mp.                                          | 12. "COV-2".mp. (16934)                                          |                                                                                                                                                                |
| 13. "SARS coronavirus".mp.                               | 13. "SARS coronavirus".mp. (6360)                                |                                                                                                                                                                |
| 14. 12 and 13                                            | 14. 12 and 13 (1045)                                             |                                                                                                                                                                |
| 15. 7 or 8 or 9 or 10 or 11 or 14                        | 15. 7 or 8 or 9 or 10 or 11 or 14 (54626)                        |                                                                                                                                                                |
| 16. 6 and 15                                             | 16. 6 and 15 (737)                                               |                                                                                                                                                                |
| 17. "randomized controlled trial"/                       | 17. "randomized controlled trial"/ (578979)                      |                                                                                                                                                                |
| 18. "randomized controlled trial (topic)"/               | 18. "randomized controlled trial (topic)"/ (187582)              |                                                                                                                                                                |
| 19. 17 or 18                                             | 19. 17 or 18 (762956)                                            |                                                                                                                                                                |
| 20. 16 and 19                                            | 20. 16 and 19 (30)                                               |                                                                                                                                                                |
|                                                          | 21. (randomi?ed and trial).mp. (928533)                          |                                                                                                                                                                |
|                                                          | 22. 20 and 21 (30)                                               |                                                                                                                                                                |

**PRISMA-P (Preferred Reporting Items for Systematic review and Meta-Analysis Protocols) 2015 checklist: recommended items to address in a systematic review protocol\***

| Section and topic                 | Item No | Checklist item                                                                                                                                                                                                                | Page |
|-----------------------------------|---------|-------------------------------------------------------------------------------------------------------------------------------------------------------------------------------------------------------------------------------|------|
| <b>ADMINISTRATIVE INFORMATION</b> |         |                                                                                                                                                                                                                               |      |
| Title:                            |         |                                                                                                                                                                                                                               |      |
| Identification                    | 1a      | Identify the report as a protocol of a systematic review                                                                                                                                                                      | 1    |
| Update                            | 1b      | If the protocol is for an update of a previous systematic review, identify as such                                                                                                                                            |      |
| Registration                      | 2       | If registered, provide the name of the registry (such as PROSPERO) and registration number                                                                                                                                    | N/A  |
| Authors:                          |         |                                                                                                                                                                                                                               |      |
| Contact                           | 3a      | Provide name, institutional affiliation, e-mail address of all protocol authors; provide physical mailing address of corresponding author                                                                                     | 1    |
| Contributions                     | 3b      | Describe contributions of protocol authors and identify the guarantor of the review                                                                                                                                           | 16   |
| Amendments                        | 4       | If the protocol represents an amendment of a previously completed or published protocol, identify as such and list changes; otherwise, state plan for documenting important protocol amendments                               | N/A  |
| Support:                          |         |                                                                                                                                                                                                                               |      |
| Sources                           | 5a      | Indicate sources of financial or other support for the review                                                                                                                                                                 | 16   |
| Sponsor                           | 5b      | Provide name for the review funder and/or sponsor                                                                                                                                                                             | N/A  |
| Role of sponsor or funder         | 5c      | Describe roles of funder(s), sponsor(s), and/or institution(s), if any, in developing the protocol                                                                                                                            | N/A  |
| <b>INTRODUCTION</b>               |         |                                                                                                                                                                                                                               |      |
| Rationale                         | 6       | Describe the rationale for the review in the context of what is already known                                                                                                                                                 | 5-6  |
| Objectives                        | 7       | Provide an explicit statement of the question(s) the review will address with reference to participants, interventions, comparators, and outcomes (PICO)                                                                      | 6-7  |
| <b>METHODS</b>                    |         |                                                                                                                                                                                                                               |      |
| Eligibility criteria              | 8       | Specify the study characteristics (such as PICO, study design, setting, time frame) and report characteristics (such as years considered, language, publication status) to be used as criteria for eligibility for the review | 7    |
| Information sources               | 9       | Describe all intended information sources (such as electronic databases, contact with study authors, trial registers or other grey literature sources) with planned dates of coverage                                         | 9-10 |
| Search strategy                   | 10      | Present draft of search strategy to be used for at least one electronic database, including planned limits, such that it could be repeated                                                                                    | 9-10 |

|                                    |     |                                                                                                                                                                                                                                                  |       |
|------------------------------------|-----|--------------------------------------------------------------------------------------------------------------------------------------------------------------------------------------------------------------------------------------------------|-------|
| Study records:                     |     |                                                                                                                                                                                                                                                  |       |
| Data management                    | 11a | Describe the mechanism(s) that will be used to manage records and data throughout the review                                                                                                                                                     | 10-11 |
| Selection process                  | 11b | State the process that will be used for selecting studies (such as two independent reviewers) through each phase of the review (that is, screening, eligibility and inclusion in meta-analysis)                                                  | 10    |
| Data collection process            | 11c | Describe planned method of extracting data from reports (such as piloting forms, done independently, in duplicate), any processes for obtaining and confirming data from investigators                                                           | 9-10  |
| Data items                         | 12  | List and define all variables for which data will be sought (such as PICO items, funding sources), any pre-planned data assumptions and simplifications                                                                                          | 8     |
| Outcomes and prioritization        | 13  | List and define all outcomes for which data will be sought, including prioritization of main and additional outcomes, with rationale                                                                                                             | 8     |
| Risk of bias in individual studies | 14  | Describe anticipated methods for assessing risk of bias of individual studies, including whether this will be done at the outcome or study level, or both; state how this information will be used in data synthesis                             | 10    |
| Data synthesis                     | 15a | Describe criteria under which study data will be quantitatively synthesised                                                                                                                                                                      | 10-11 |
|                                    | 15b | If data are appropriate for quantitative synthesis, describe planned summary measures, methods of handling data and methods of combining data from studies, including any planned exploration of consistency (such as $I^2$ , Kendall's $\tau$ ) | 10-11 |
|                                    | 15c | Describe any proposed additional analyses (such as sensitivity or subgroup analyses, meta-regression)                                                                                                                                            | 8     |
|                                    | 15d | If quantitative synthesis is not appropriate, describe the type of summary planned                                                                                                                                                               | N/A   |
| Meta-bias(es)                      | 16  | Specify any planned assessment of meta-bias(es) (such as publication bias across studies, selective reporting within studies)                                                                                                                    | 10-11 |
| Confidence in cumulative evidence  | 17  | Describe how the strength of the body of evidence will be assessed (such as GRADE)                                                                                                                                                               | 10-11 |

**\* It is strongly recommended that this checklist be read in conjunction with the PRISMA-P Explanation and Elaboration (cite when available) for important clarification on the items. Amendments to a review protocol should be tracked and dated. The copyright for PRISMA-P (including checklist) is held by the PRISMA-P Group and is distributed under a Creative Commons Attribution Licence 4.0.**

*From: Shamseer L, Moher D, Clarke M, Ghersi D, Liberati A, Petticrew M, Shekelle P, Stewart L, PRISMA-P Group. Preferred reporting items for systematic review and meta-analysis protocols (PRISMA-P) 2015: elaboration and explanation. BMJ. 2015 Jan 2;349(jan02 1):g7647.*

# BMJ Open

## A Prospective Meta-Analysis Protocol on Randomised Trials of Renin-Angiotensin-System Inhibitors in Patients with Coronavirus Disease-2019 (COVID-19): An initiative of the International Society of Hypertension.

|                                 |                                                                                                                                                                                                                                                                                                                                                                                                                                                                                                                                                                                                                                                                                                                                                                                                                                                                                                                                                                                                                                                                                                                                                                                                                                                                                                                                                                                                              |
|---------------------------------|--------------------------------------------------------------------------------------------------------------------------------------------------------------------------------------------------------------------------------------------------------------------------------------------------------------------------------------------------------------------------------------------------------------------------------------------------------------------------------------------------------------------------------------------------------------------------------------------------------------------------------------------------------------------------------------------------------------------------------------------------------------------------------------------------------------------------------------------------------------------------------------------------------------------------------------------------------------------------------------------------------------------------------------------------------------------------------------------------------------------------------------------------------------------------------------------------------------------------------------------------------------------------------------------------------------------------------------------------------------------------------------------------------------|
| Journal:                        | <i>BMJ Open</i>                                                                                                                                                                                                                                                                                                                                                                                                                                                                                                                                                                                                                                                                                                                                                                                                                                                                                                                                                                                                                                                                                                                                                                                                                                                                                                                                                                                              |
| Manuscript ID                   | bmjopen-2020-043625.R2                                                                                                                                                                                                                                                                                                                                                                                                                                                                                                                                                                                                                                                                                                                                                                                                                                                                                                                                                                                                                                                                                                                                                                                                                                                                                                                                                                                       |
| Article Type:                   | Protocol                                                                                                                                                                                                                                                                                                                                                                                                                                                                                                                                                                                                                                                                                                                                                                                                                                                                                                                                                                                                                                                                                                                                                                                                                                                                                                                                                                                                     |
| Date Submitted by the Author:   | 24-Dec-2020                                                                                                                                                                                                                                                                                                                                                                                                                                                                                                                                                                                                                                                                                                                                                                                                                                                                                                                                                                                                                                                                                                                                                                                                                                                                                                                                                                                                  |
| Complete List of Authors:       | Gnanenthiran, Sonali; The George Institute for Global Health, ; Concord Hospital,<br>Borghi, Claudio; S.Orsola Malpighi University Hospital, Department of Medical and Surgical Sciences<br>Burger, Dylan; Kidney Research Centre, Ottawa Hospital Research Institute, Department of Cellular and Molecular Medicine, University of Ottawa<br>Charchar, Fadi; Federation University Australia,<br>Poulter, Neil; Imperial Clinical Trials Unit, Imperial College London<br>Schlaich, Markus P.; University of Western Australia, Medical School<br>Steckelings, Ulrike; Department of Cardiovascular and Renal Research, University of Southern Denmark<br>Stergiou, George; Third University, Hypertension Center STRIDE-7<br>Tomaszewski, Maciej; Division of Medicine and Manchester Academic Health Science Centre, Manchester University NHS Foundation Trust Manchester<br>Unger, Thomas; Maastricht University, CARIM – School for Cardiovascular Diseases<br>Wainford, Richard; Boston University, Department of Pharmacology and Experimental Therapeutics and the Whitaker Cardiovascular Institute, Boston University School of Medicine<br>Williams, Bryan; University College London, Institute of Cardiovascular Science;<br>Rodgers, Anthony; The George Institute for Global Health, Sydney Medical School, University of Sydney,<br>Schutte, Aletta; The George Institute for Global Health |
| <b>Primary Subject Heading</b>: | Cardiovascular medicine                                                                                                                                                                                                                                                                                                                                                                                                                                                                                                                                                                                                                                                                                                                                                                                                                                                                                                                                                                                                                                                                                                                                                                                                                                                                                                                                                                                      |
| Secondary Subject Heading:      | Infectious diseases, Global health                                                                                                                                                                                                                                                                                                                                                                                                                                                                                                                                                                                                                                                                                                                                                                                                                                                                                                                                                                                                                                                                                                                                                                                                                                                                                                                                                                           |
| Keywords:                       | CARDIOLOGY, COVID-19, Hypertension < CARDIOLOGY                                                                                                                                                                                                                                                                                                                                                                                                                                                                                                                                                                                                                                                                                                                                                                                                                                                                                                                                                                                                                                                                                                                                                                                                                                                                                                                                                              |
|                                 |                                                                                                                                                                                                                                                                                                                                                                                                                                                                                                                                                                                                                                                                                                                                                                                                                                                                                                                                                                                                                                                                                                                                                                                                                                                                                                                                                                                                              |

1  
2  
3  
4  
5  
6  
7  
8  
9  
10  
11  
12  
13  
14  
15  
16  
17  
18  
19  
20  
21  
22  
23  
24  
25  
26  
27  
28  
29  
30  
31  
32  
33  
34  
35  
36  
37  
38  
39  
40  
41  
42  
43  
44  
45  
46  
47  
48  
49  
50  
51  
52  
53  
54  
55  
56  
57  
58  
59  
60



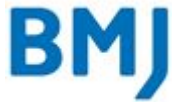

I, the Submitting Author has the right to grant and does grant on behalf of all authors of the Work (as defined in the below author licence), an exclusive licence and/or a non-exclusive licence for contributions from authors who are: i) UK Crown employees; ii) where BMJ has agreed a CC-BY licence shall apply, and/or iii) in accordance with the terms applicable for US Federal Government officers or employees acting as part of their official duties; on a worldwide, perpetual, irrevocable, royalty-free basis to BMJ Publishing Group Ltd ("BMJ") its licensees and where the relevant Journal is co-owned by BMJ to the co-owners of the Journal, to publish the Work in this journal and any other BMJ products and to exploit all rights, as set out in our [licence](#).

The Submitting Author accepts and understands that any supply made under these terms is made by BMJ to the Submitting Author unless you are acting as an employee on behalf of your employer or a postgraduate student of an affiliated institution which is paying any applicable article publishing charge ("APC") for Open Access articles. Where the Submitting Author wishes to make the Work available on an Open Access basis (and intends to pay the relevant APC), the terms of reuse of such Open Access shall be governed by a Creative Commons licence – details of these licences and which [Creative Commons](#) licence will apply to this Work are set out in our licence referred to above.

Other than as permitted in any relevant BMJ Author's Self Archiving Policies, I confirm this Work has not been accepted for publication elsewhere, is not being considered for publication elsewhere and does not duplicate material already published. I confirm all authors consent to publication of this Work and authorise the granting of this licence.

1  
2  
3 **A Prospective Meta-Analysis Protocol on Randomised Trials of Renin-Angiotensin**  
4  
5  
6 **System Inhibitors in Patients with Coronavirus Disease 2019 (COVID-19):**

7  
8 **An initiative of the International Society of Hypertension.**  
9

10  
11  
12  
13 Sonali R Gnanenthiran<sup>1</sup>, Claudio Borghi<sup>2</sup>, Dylan Burger<sup>3</sup>, Fadi Charchar<sup>4</sup>, Neil R Poulter<sup>5</sup>,  
14 Markus Schlaich<sup>6</sup>, Ulrike Muscha Steckelings<sup>7</sup>, George S Stergiou<sup>8</sup>, Maciej Tomaszewski<sup>9</sup>,  
15 Thomas Unger<sup>10</sup>, Richard D Wainford<sup>11</sup>, Bryan Williams<sup>12</sup>, Anthony Rodgers<sup>1</sup>, Aletta E Schutte<sup>1</sup>  
16  
17  
18  
19

- 20  
21  
22 1. The George Institute for Global Health; University of New South Wales, Sydney, NSW,  
23 Australia  
24 2. Department of Medical and Surgical Sciences, University of Bologna, Bologna, Italy  
25 3. Kidney Research Centre, Ottawa Hospital Research Institute, Department of Cellular and  
26 Molecular Medicine, University of Ottawa, Ottawa, Canada  
27 4. School of Health and Life Sciences, Federation University Australia, Ballarat, Victoria,  
28 Australia  
29 5. Imperial Clinical Trials Unit, Imperial College London, United Kingdom  
30 6. Dobney Hypertension Centre, School of Medicine, Royal Perth Hospital Unit, University  
31 of Western Australia, Perth, Australia  
32 7. Department of Cardiovascular and Renal Research, University of Southern Denmark,  
33 Odense, Denmark  
34 8. Hypertension Center STRIDE-7, School of Medicine, Third Department of Medicine,  
35 Sotiria Hospital, National and Kapodistrian University of Athens, Athens, Greece  
36 9. Division of Medicine and Manchester Academic Health Science Centre, Manchester  
37 University NHS Foundation Trust Manchester, United Kingdom  
38 10. CARIM – School for Cardiovascular Diseases, Maastricht University, Maastricht, the  
39 Netherlands  
40 11. Department of Pharmacology and Experimental Therapeutics and the Whitaker  
41 Cardiovascular Institute, Boston University School of Medicine, Massachusetts, USA.  
42 12. Institute of Cardiovascular Science, University College London and National Institute for  
43 Health Research (NIHR) University College London Hospitals Biomedical Research Centre,  
44 London, United Kingdom.  
45  
46  
47  
48  
49  
50

51 **Address for correspondence:**

52 Professor Aletta E Schutte  
53 School of Population Health, University of New South Wales, Kensington Campus, High  
54 Street, Sydney, NSW 2052, Australia  
55 E-mail: [a.schutte@unsw.edu.au](mailto:a.schutte@unsw.edu.au); Tel: +61 450 315 918  
56  
57

58 Word count: 2223  
59  
60



## ABSTRACT

**Introduction:** Whether angiotensin-converting enzyme inhibitors (ACEi) or angiotensin II receptor blocker (ARB) therapy should be continued, initiated or ceased in patients with coronavirus disease 2019 (COVID-19) is uncertain. Given the widespread use of ACEi/ARBs worldwide, guidance on the use of these drugs is urgently needed. This prospective meta-analysis aims to pool data from randomised controlled trials (RCTs) to assess the safety and efficacy of ACEi/ARB therapy in adults infected with severe acute respiratory syndrome coronavirus 2 (SARS-CoV-2).

**Methods and Analysis:** RCTs will be eligible if they compare patients with COVID-19 randomised to ACEi/ARB continuation or commencement versus no ACEi/ARB therapy; study duration  $\geq 14$  days; recruitment completed between March 2020 and May 2021. The primary outcome will be all-cause mortality at  $\leq 30$  days. Secondary outcomes will include mechanical ventilation, admission to intensive care or cardiovascular events at short term follow-up ( $\leq 30$  days), and all-cause mortality at longer term follow-up ( $>1$  month). Pre-specified subgroup analyses will assess the effect of sex; age; comorbidities; smoking status; ethnicity; country of origin on all-cause mortality. A search of ClinicalTrials.gov has been performed, which will be followed by a formal search of trial registers, pre-print servers, MEDLINE, EMBASE and Cochrane Central Register of Controlled Trials to identify RCTs that meet inclusion criteria. To date, a search of ClinicalTrials.gov identified 19 potentially eligible trials for this meta-analysis. We will request trial investigators/sponsors to contribute standardised grouped tabular outcome data.

**Ethics and dissemination:** Ethics approval and informed consent will be the responsibility of the individual RCTs. Dissemination of results will occur by peer-reviewed publication. The

1  
2  
3 results of our analysis can inform public health policy and clinical decision making regarding  
4  
5 ACEi/ARB use in patients with COVID-19 on a global scale.  
6  
7  
8  
9  
10  
11  
12  
13  
14  
15  
16  
17  
18  
19  
20  
21  
22  
23  
24  
25  
26  
27  
28  
29  
30  
31  
32  
33  
34  
35  
36  
37  
38  
39  
40  
41  
42  
43  
44  
45  
46  
47  
48  
49  
50  
51  
52  
53  
54  
55  
56  
57  
58  
59  
60

For peer review only

### STRENGTHS AND LIMITATIONS OF THIS STUDY

- First prospective meta-analysis of randomised controlled trials assessing the safety and efficacy of ACEi/ARBs in adults with coronavirus 2019 disease (COVID-19).
- This meta-analysis uses a collaborative international approach to allow pooling and dissemination of results. This has the potential to inform international public health policy and clinical decision making for ongoing ACEi/ARB use in patients with COVID-19.
- Randomised controlled trials are currently under way with some having the potential to be underpowered. Pooling of data will overcome this shortcoming.
- The completion of these trials prior to data pooling is a limitation, as is the willingness of trialists to collaborate in data sharing.

review only

## INTRODUCTION

Renin-angiotensin system (RAS) inhibitors, including angiotensin-converting enzyme inhibitors (ACEi) and angiotensin II receptor blockers (ARB), are the most widely prescribed anti-hypertensive treatments globally, used by hundreds of millions of people worldwide.<sup>1</sup> ACEi/ARB therapy are not only first line agents for the treatment of hypertension, but are also the cornerstones of treating cardiovascular and kidney disease such as heart failure, coronary heart disease, diabetes and chronic kidney disease. However, infection with severe acute respiratory syndrome coronavirus 2 (SARS-CoV-2) involves the viral spike protein attaching to the angiotensin-converting enzyme 2 (ACE2) receptor to infect epithelial cells in the respiratory tract,<sup>2</sup> with increased binding affinity a key determinant of pathogenicity.<sup>3</sup> Animal studies have demonstrated that ACEi/ARB therapy may upregulate ACE2 receptor expression<sup>4</sup> and produce increased cardiac ACE2 mRNA levels, which may promote viral cell invasion.<sup>4,6</sup> Upregulated expression of ACE2 receptors on the cell surface has been postulated to increase the risk of infection with SARS-CoV-2 and the disease severity, with subsequent life-threatening complications.<sup>7,8</sup> At the same time, data from animal studies suggest that increased ACE2 expression secondary to ACEi/ARB use might have protective benefits on cardiac, kidney and pulmonary function and thus reduce the severity of coronavirus disease 2019 (COVID-19).<sup>9</sup>

Observational retrospective studies in humans and meta-analyses of these studies suggest that there is no adverse effect of RAS blockade on COVID-19 severity and outcome,<sup>10-16</sup> but there may be possible protective benefits including reduced rates of mortality,<sup>17</sup> critical disease<sup>15</sup> and admission to intensive care.<sup>18</sup> Observational studies, even rigorous ones, can still have multiple sources of bias, and thus more robust evidence is needed for sound clinical

1  
2  
3 decision making. Randomised controlled trials (RCTs) are needed to mitigate this risk.  
4  
5  
6 However, to date reliable data from randomised controlled clinical trials are unavailable to  
7  
8 guide clinical decision-making. As a result, it is uncertain whether ACEi/ARB therapy should  
9  
10 be continued, withdrawn, or initiated in patients with COVID-19.  
11  
12  
13

14  
15 International hypertension, cardiovascular and nephrology societies have consistently  
16  
17 recommended that patients continue ACEi/ARB therapy during the COVID-19 pandemic, on  
18  
19 the basis of the strong and well-documented evidence on their protective effects, but identify  
20  
21 a need for more reliable human data.<sup>19-23</sup> There are multiple RCTs in process, which will better  
22  
23 inform clinical decision making rather than relying on observational human studies<sup>10-14</sup> and  
24  
25 inconsistent animal data.<sup>4 6</sup> Most of the RCTs under way are small to moderate in size (~40%  
26  
27 aim to recruit less than 250 participants), with many unlikely to meet their recruitment  
28  
29 targets. These trials are also unlikely to be powered to answer questions regarding subgroup  
30  
31 populations, including whether there is utility of ACEi/ARB therapy in patients with COVID-19  
32  
33 with concomitant hypertension, cardiovascular or kidney disease. Given the uncertainty  
34  
35 of ACEi/ARB use in those with COVID-19, some trials are starting ACEi/ARB therapy for  
36  
37 possible benefit, while other trials are stopping the same therapy due to concerns about  
38  
39 harm. These RCTs are not completely free from bias, but nevertheless represent a higher  
40  
41 quality of evidence than observational studies. A prospective meta-analysis led by the  
42  
43 International Society of Hypertension will therefore be an ideal approach to address these  
44  
45 limitations, as well as promoting international collaboration. This approach entails studies to  
46  
47 be identified, evaluated, and determined to be eligible before the results of any included  
48  
49 studies are known or published, thereby avoiding some of the potential biases inherent in  
50  
51 standard, retrospective meta-analyses.  
52  
53  
54  
55  
56  
57  
58  
59  
60

## OBJECTIVES

We will therefore perform a prospective meta-analysis of RCTs recruiting patients with COVID-19 to assess the safety and efficacy of ACEi/ARB therapy compared to those not on ACEi/ARBs. As primary outcome, pooled data will be used to assess all-cause mortality associated with ACEi/ARB therapy compared to those not on ACEi/ARBs stratified by age, co-morbidity, sex, ethnicity, and trial characteristics.

## METHODS AND ANALYSIS

### Protocol Design

For this meta-analysis, we will only include RCTs to minimise the impact of bias and confounding. We herewith describe our methods as per the Preferred Reporting Items for Systematic Review and Meta-Analysis for protocol (PRISMA) recommendations.<sup>24</sup> Final reporting of this study will be compliant with the main PRISMA statement.

### Eligibility Criteria

For clinical trials to be eligible for inclusion, the following criteria must be met: (i) RCTs recruiting between March 2020 and March 2021; (ii) aged  $\geq 18$  years; (iii) laboratory confirmed SARS-CoV-2 infection; (iv) comparison of patients randomised to ACEi/ARB versus no ACEi/ARB therapy; (v) findings reported in English; (vi) trial duration  $\geq 14$  days; (viii) oral administration of ACEi/ARB therapies.

We will include trials that investigate continuation versus cessation of ACEi/ARB among patients currently treated with ACEi/ARB; and trials that report initiation of ACEi/ARB versus

1  
2  
3 control in those not currently treated with such therapies. These will be pooled in an  
4  
5 ACEi/ARB vs. no ACEi/ARB meta-analysis, with appropriate prespecification of preplanned  
6  
7 sensitivity analyses from the two groups of trials given the fundamental differences. Studies  
8  
9 must contain sufficient detail and be able to provide at least one outcome outlined within our  
10  
11 data extraction form (Table 1) and be reported using an intention to treat basis. If an RCT  
12  
13 consists of multiple arms, we will include only the relevant arms. The exclusion criteria will be  
14  
15 at the discretion of each individual trial.  
16  
17  
18  
19  
20  
21  
22

23 The intervention will comprise continuation or initiation of ACEi/ARB therapy. The control will  
24  
25 be discontinuation of current ACEi/ARB therapy, substitution with an equivalent dose of non-  
26  
27 ACEi/ARB therapy, placebo or usual care.  
28  
29  
30  
31  
32

### 33 **Outcomes**

34  
35 The primary outcome will be all-cause mortality at  $\leq 30$  days. Secondary outcomes will include  
36  
37 mechanical ventilation at  $\leq 30$  days; admission to intensive care at  $\leq 30$  days; myocardial  
38  
39 infarction at  $\leq 30$  days, revascularisation at  $\leq 30$  days, congestive cardiac failure at  $\leq 30$  days;  
40  
41 pulmonary embolism and/or deep vein thrombosis at  $\leq 30$  days, hospitalisation at  $\leq 30$  days  
42  
43 and acute kidney injury (defined as per each individual RCT) at  $\leq 30$  days; all-cause mortality  
44  
45 at  $>1$  month follow-up. Standardised grouped tabular de-identified data will be requested  
46  
47 from triallists for both short-term ( $\leq 30$  days) and longer term ( $>1$  month) follow up where  
48  
49 available (Table 1). Individual identifiable patient data will not be requested.  
50  
51  
52  
53  
54  
55  
56

### 57 **Search strategy and searching sources**

58  
59  
60

1  
2  
3 An electronic search of ClinicalTrial.gov was performed to identify potential ongoing trials for  
4 inclusion in the meta-analysis. Figure 1 summarises the trial search as of August 2020  
5 performed using the search terms: coronavirus 2019, COVID-19, SARS-CoV-2, randomised  
6 controlled trial, ACEi and/or ARB. A total of 21 trials were identified which potentially met the  
7 eligibility criteria (Figure 1, Table 2). Of these, 5 trials evaluated the continuation of ACEi/ARB  
8 therapies in those already on such therapies compared to discontinuation, and 14 trials  
9 involved initiation of ACEi/ARB therapies in those not on such therapies. Eleven trials did not  
10 meet inclusion criteria due to (a) not assessing ACEi/ARB therapies (n=6), (b) absence of a  
11 control group (n=2), (c) use of non-oral administration of ACEi/ARB therapies (n=2), or (d)  
12 recruitment of patients with active malignancy (n=1). We extracted information about eligible  
13 investigators to invite them to participate in the prospective meta-analysis by contributing  
14 tabular data. An invitation letter will be sent via email and will include details about the study  
15 protocol, offer of authorship, identification of the time for data retrieval and confirmation of  
16 data security.

17  
18  
19  
20  
21  
22  
23  
24  
25  
26  
27  
28  
29  
30  
31  
32  
33  
34  
35  
36  
37  
38  
39  
40 This search will be continuously updated, and investigators of newly reported and eligible  
41 trials will be invited to join the collaboration. Using the Cochrane Collaboration guidelines,<sup>25</sup>  
42 electronic searches of MEDLINE (1996–present), EMBASE (1996–present) and the Cochrane  
43 Central Register of Controlled Trials (most recent edition) will also be performed to identify  
44 any other RCTs that meet inclusion criteria in March 2021. A comprehensive search strategy  
45 using MeSH terms and text words will be used (Supplemental Table 1). Two investigators (SG  
46 and AES) will screen the abstracts for potential inclusion against the eligibility criteria, and  
47 screen the full texts. Reference management software (EndNote) will be used to store  
48 identified records.



1  
2  
3  
4  
5  
6 All provided data will be stored on a password protected server, with limited access only to  
7  
8 those directly involved in data analysis.  
9

### 10 11 12 13 **Study Evaluation**

14  
15 A quality assessment of each RCT will be performed independently by two authors (SRG, AES),  
16  
17 with disagreements resolved by discussion. This will include evaluation of allocation  
18  
19 sequence, allocation concealment, blinding, loss to follow-up, and completeness of outcome  
20  
21 reporting.<sup>25</sup> Randomisation procedures, treatment allocation according to assignment,  
22  
23 outcomes collected and compared across groups; blinding methods; and risk of bias both at  
24  
25 study and outcome levels will also be assessed using the Cochrane Risk of Bias Tool.<sup>26</sup> Two  
26  
27 investigators (SG and AES) will independently review the articles and any disagreements will  
28  
29 be adjudicated by a third independent investigator (AR).  
30  
31  
32  
33  
34  
35  
36  
37  
38  
39

### 40 41 42 43 44 45 46 47 48 49 50 51 52 53 54 55 56 57 58 59 60 **Statistical Analysis**

60  
Trial-specific outcome data will be pooled. For binary outcomes, risk ratios and 95% CI will be  
estimated using log-binomial mixed-effects models (or odds ratios from logistic models as  
required). Key results will be presented using Forest plots, and the  $I^2$  statistic will be used to  
quantify the degree of heterogeneity between studies.<sup>27</sup> A two-tailed p-value of 5% will be  
used for hypothesis testing. A fixed effects analysis will be used unless there is significant  
heterogeneity (as evidenced by  $I^2 > 70\%$  and quantitatively large variation), in which case  
pooling will not be performed.<sup>28</sup> If heterogeneity is found, we will attempt to determine  
potential reasons by examining characteristics of individual trials. Potential outliers will be

1  
2  
3  
4 investigated in a sensitivity analysis by dropping each study at a time. Publication bias will be  
5  
6  
7 assessed by visual inspection of funnel plots and formally using Egger's method to evaluate  
8  
9 the tendency of publishing studies with statistically significant findings.<sup>29</sup> We will use meta-  
10  
11 regression analyses to further explore heterogeneity of treatment effects if considerable  
12  
13 residual heterogeneity remains after controlling for variables. Analyses will also be stratified  
14  
15 by the prespecified subgroup analysis as mentioned below. In general, reporting of the  
16  
17 findings will follow PRISMA guidelines.<sup>24</sup> All analyses will be conducted using Review Manager  
18  
19 5.3 software (Copenhagen, The Nordic Cochrane Centre, The Cochrane Collaboration, 2014).  
20  
21  
22

23  
24  
25  
26 There is potential heterogeneity in trial inclusion criteria, which may affect the meta-analysis  
27  
28 findings and be a source of bias. Therefore, subgroup analyses will be performed depending  
29  
30 on data availability to explore differences in effects by partitioning by study-level categorical  
31  
32 covariates. We will aim to assess all-cause mortality at  $\leq 30$  days and  $>1$  month based on the  
33  
34 following stratifications: (i) sex: male versus female; (ii) age:  $<60$  years versus  $\geq 60$  years; (iii)  
35  
36 comorbidities: hypertension versus no hypertension, diabetes versus no diabetes, chronic  
37  
38 kidney disease (CKD) defined as  $eGFR < 60$  mL/min/1.73m<sup>2</sup> versus no CKD, cardiovascular  
39  
40 disease (CVD) [defined as established coronary artery disease, heart failure, arrhythmia and/or  
41  
42 stroke] versus no CVD, chronic obstructive pulmonary disease versus no chronic obstructive  
43  
44 pulmonary disease; (iv) smoking status: ever smoked versus non-smokers; (v) hospitalisation  
45  
46 status: hospitalised versus non-hospitalised patients; (vi) ethnicity: White, South-East/East  
47  
48 Asian, South Asian, African and Other; (vii) trial type: randomised trials that investigate  
49  
50 continuation and cessation of ACEi/ARBs among patients currently treated with ACEi/ARBs,  
51  
52 versus trials that investigate initiation of ACEi/ARBs in those not currently treated with such  
53  
54  
55  
56  
57  
58  
59  
60

1  
2  
3 therapies compared to control; (vii) region: Americas, Europe, Africa, South and West  
4  
5 Asia/Middle East, and North Asia/South-East Asia/Oceania; (viii) ACEi and ARB separately if  
6  
7 feasible as pooling ACEi and ARB together does not account for between-class differences.;  
8  
9  
10 (ix) follow-up period: final short term follow-up 14 days compared to final follow-up at 28-30  
11  
12 days; (x) asymptomatic vs symptomatic clinical status (Supplemental Tables 2 and 3).  
13  
14  
15  
16  
17

### 18 **Data Statement**

19  
20 We will not have access to identifiable patient information. All data sharing and storage  
21  
22 procedures will be compliant with the Australian Data Privacy Act of 1988. All trial data will  
23  
24 be considered confidential and will not be provided to any third party. Data will be stored on  
25  
26 site at The George Institute for Global Health, King St Campus, Sydney, Australia, with strict  
27  
28 confidentiality and comprehensive data security.  
29  
30  
31  
32  
33  
34

### 35 **Limitations**

36  
37 Limitations of our meta-analysis reflect the limitations of the included RCTs, and are outside  
38  
39 the control of our planned analyses. We have attempted to be inclusive as possible and aim  
40  
41 to perform subgroup analyses given the trials are mostly small and may not be powered for  
42  
43 such analyses. Key limitations include the relatively short follow-up duration of included trials  
44  
45 (most  $\leq 30$  days), which prevent robust assessment of long-term outcomes such as  
46  
47 cardiovascular events and overall mortality. Additionally, the majority of patients on  
48  
49 ACEi/ARBs will likely be on such therapy to treat hypertension (although this has not been  
50  
51 specified in the inclusion trials of the eligible RCTs) and the generalisability of our findings to  
52  
53 cardiac failure and renal disease may be uncertain if there are insufficient numbers.  
54  
55  
56  
57  
58  
59  
60

### **Ethics and dissemination**

All individual trials will require Ethics Committee or Institution Review Board approval. We will publish our findings in peer-reviewed medical journals. Publications will be in the name of the collaborative group involving all trialists who provided data. Further, we will share and present our findings at scientific meetings and through the networks and memberships across professional societies.

### **Implications of the review**

Given the widespread use of ACEi and ARBs worldwide, guidance on the use of ACEi/ARBs in adults with COVID-19 is urgently needed, relying on evidence beyond observational data. This collaborative international approach will allow dissemination of results, which will inform public health policy and clinical decision making for ongoing ACEi/ARBs use on an international scale. Healthcare providers and policy-makers can use the findings to improve the clinical decision making by developing strategies and guidelines to guide use of ACEi/ARBs in hypertension, cardiovascular disease and kidney disease.

### **Patient and public involvement**

Patients were not involved in the development of the research question, outcome measure and study design.

1  
2  
3  
4  
5  
6  
7  
8  
9  
10  
11  
12  
13  
14  
15  
16  
17  
18  
19  
20  
21  
22  
23  
24  
25  
26  
27  
28  
29  
30  
31  
32  
33  
34  
35  
36  
37  
38  
39  
40  
41  
42  
43  
44  
45  
46  
47  
48  
49  
50  
51  
52  
53  
54  
55  
56  
57  
58  
59  
60  
**REFERENCES**

1. Gu Q, Burt VL, Dillon CF, Yoon S. Trends in antihypertensive medication use and blood pressure control among United States adults with hypertension: the National Health And Nutrition Examination Survey, 2001 to 2010. *Circulation* 2012;126(17):2105-14.
2. Li W, Moore MJ, Vasilieva N, Sui J, Wong SK, Berne MA, Somasundaran M, Sullivan JL, Luzuriaga K, Greenough TC, Choe H, Farzan M. Angiotensin-converting enzyme 2 is a functional receptor for the SARS Coronavirus. *Nature* 2003;426(6965):450-54.
3. Hoffmann M, Kleine-Weber H, Schroeder S, Krüger N, Herrler T, Erichsen S, Schiergens TS, Herrler G, Wu NH, Nitsche A, Müller MA, Drosten C, Pöhlmann S. SARS-CoV-2 cell entry depends on ACE2 and TMPRSS2 and is blocked by a clinically proven protease inhibitor. *Cell* 2020;181(2):271-80.
4. Ferrario CM, Jessup J, Chappell MC, Averill DB, Brosnihan KB, Tallant EA, Diz DI, Gallagher PE. Effect of angiotensin-converting enzyme inhibition and angiotensin II receptor blockers on cardiac angiotensin-converting enzyme 2. *Circulation* 2005;111(20):2605-10.
5. Igase M, Kohara K, Nagai T, Miki T, Ferrario CM. Increased expression of angiotensin converting enzyme 2 in conjunction with reduction of neointima by angiotensin II type 1 receptor blockade. *Hypertens Res* 2008;31(3):553-9.
6. Ocaranza MP, Moya J, Barrientos V, Alzamora R, Hevia D, Morales C, Pinto M, Escudero N, García L, Novoa U, Ayala P, Díaz-Araya G, Godoy I, Chiong M, Lavandero S, Jalil JE, Michea L. Angiotensin-(1-9) reverses experimental hypertension and cardiovascular damage by inhibition of the angiotensin converting enzyme/Ang II Axis. *J Hypertens* 2014;32(4):771-83.

- 1  
2  
3 7. Fang L, Karakiulakis G, Roth M. Are patients with hypertension and diabetes mellitus at  
4  
5 increased risk for COVID-19 infection? *Lancet Resp Med* 2020;8(4):e21.  
6  
7
- 8 8. Sommerstein R, Grani C. Preventing a COVID-19 pandemic: ACE inhibitors as a potential risk  
9  
10 factor for fatal COVID-19. *BMJ* 2020;368:m810.  
11  
12
- 13 9. Sparks MA, South A, Welling P, Luther M, Cohen J, Byrd JB, Burrell L, Batlle D, Tomlinson L,  
14  
15 Bhalla V, Rheault MN, Soler MJ, Swaminathan S, Hiremath S. Sound science before  
16  
17 quick judgement regarding RAS blockade in COVID-19. *Clin J Am Soc Nephrol* 2020;  
18  
19 7(15):714-16.  
20  
21
- 22 10. de Abajo FJ, Rodriguez-Martin S, Lerma V, Mejía-Abril G, Aguilar M, García-Luque A,  
23  
24 Laredo L, Laosa O, Centeno-Soto GA, Ángeles Gálvez M, Puerro M, González-Rojano E,  
25  
26 Pedraza L, de Pablo I, Abad-Santos F, Rodríguez-Mañas L, Gil M, Tobías A, Rodríguez-  
27  
28 Miguel A, Rodríguez-Puyol D; MED-ACE2-COVID19 study group. Use of renin-  
29  
30 angiotensin-aldosterone system inhibitors and risk of COVID-19 requiring admission  
31  
32 to hospital: a case-population study. *Lancet* 2020;395(10238):1705-14.  
33  
34  
35  
36
- 37 11. Jung SY, Choi JC, You SH, Kim WY. Association of renin-angiotensin-aldosterone system  
38  
39 inhibitors with COVID-19-related outcomes in Korea: a nationwide population-based  
40  
41 cohort study. *Clin Infect Dis* 2020;Epub ahead of print. DOI 10.1093/cid/ciaa624  
42  
43  
44
- 45 12. Li J, Wang X, Chen J, Zhang H, Deng A. Association of renin-angiotensin system inhibitors  
46  
47 with severity or risk of death in patients with hypertension hospitalized for  
48  
49 coronavirus disease 2019 (COVID-19) infection in Wuhan, China. *JAMA Cardiol* 2020;  
50  
51 5(7):825-830.  
52  
53
- 54 13. Mancia G, Rea F, Ludergrani M, Apolone G, Corrao G. Renin-angiotensin-aldosterone  
55  
56 system blockers and the risk of COVID-19. *N Engl J Med* 2020;382(25):2431-40.  
57  
58  
59  
60

- 1  
2  
3  
4  
5  
6  
7  
8  
9  
10  
11  
12  
13  
14  
15  
16  
17  
18  
19  
20  
21  
22  
23  
24  
25  
26  
27  
28  
29  
30  
31  
32  
33  
34  
35  
36  
37  
38  
39  
40  
41  
42  
43  
44  
45  
46  
47  
48  
49  
50  
51  
52  
53  
54  
55  
56  
57  
58  
59  
60
14. Reynolds HR, Adhikari S, Pulgarin C, Troxel AB, Iturrate E, Johnson SB, Hausvater A, Newman JD, Berger JS, Bangalore S, Katz SD, Fishman GI, Kunichoff D, Chen Y, Ogedegbe G, Hochman JS. Renin-angiotensin-aldosterone system inhibitors and risk of COVID-19. *N Engl J Med* 2020;382(25):2441-48.
15. Pirola CJ, Sookoian S. Estimation of Renin-Angiotensin-Aldosterone-System (RAAS)-Inhibitor Effect on COVID-19 Outcome: A Meta-analysis. *J Infect* 2020;S0163-4453(20):30329-7.
16. Guo X, Zhu Y, Hong Y. Decreased Mortality of COVID-19 With Renin-Angiotensin-Aldosterone System Inhibitors Therapy in Patients With Hypertension: A Meta-Analysis. *Hypertension* 2020;76(2):e13-e14.
17. Zhang P, Zhu L, Cai J, Lei F, Qin JJ, Xie J, Liu YM, Zhao YC, Huang X, Lin L, Xia M, Chen MM, Cheng X, Zhang X, Guo D, Peng Y, Ji YX, Chen J, She ZG, Wang Y, Xu Q, Tan R, Wang H, Lin J, Luo P, Fu S, Cai H, Ye P, Xiao B, Mao W, Liu L, Yan Y, Liu M, Chen M, Zhang XJ, Wang X, Touyz RM, Xia J, Zhang BH, Huang X, Yuan Y, Loomba R, Liu PP, Li H. Association of inpatient use of angiotensin-converting enzyme inhibitors and angiotensin II receptor blockers with mortality among patients with hypertension hospitalized with COVID-19. *Circ Res* 2020;126(12):1671-81.
18. Felice C, Nardin C, Di Tanna GL, Grossi U, Bernardi E, Scaldaferrri L, Romagnoli M, Tonon L, Cavasin P, Novello S, Scarpa R, Farnia A, De Menis E, Rigoli R, Cinetto F, Pauletto P, Agostini C, Rattazzi M. Use of RAAS inhibitors and risk of clinical deterioration in COVID-19: results from an Italian cohort of 133 hypertensives. *Am J Hypertens* 2020; epub ahead of print. DOI 10.1093/ajh/hpaa096

- 1  
2  
3  
4  
5  
6  
7  
8  
9  
10  
11  
12  
13  
14  
15  
16  
17  
18  
19  
20  
21  
22  
23  
24  
25  
26  
27  
28  
29  
30  
31  
32  
33  
34  
35  
36  
37  
38  
39  
40  
41  
42  
43  
44  
45  
46  
47  
48  
49  
50  
51  
52  
53  
54  
55  
56  
57  
58  
59  
60
19. International Society of Hypertension. Statement on COVID-19. 2020. [Available from: <https://ish-world.com/news/a/A-statement-from-the-International-Society-of-Hypertension-on-COVID-19>. Accessed May 6, 2020]
  20. American College of Cardiology, American Heart Association and Heart Failure Society of America. Patients taking ACE-i and ARBs who contract COVID-19 should continue treatment, unless otherwise advised by their physician 2020. [Available from: <https://www.acc.org/latest-in-cardiology/articles/2020/03/17/08/59/hfsa-acc-aha-statement-addresses-concerns-re-using-raas-antagonists-in-covid-19>. Accessed May 6, 2020]
  21. European Society of Cardiology Council on Hypertension. Position statement of the ESC Council on Hypertension on ACE-inhibitors and angiotensin receptor blockers 2020 [Available from: [https://www.escardio.org/Councils/Council-on-Hypertension-\(CHT\)/News/position-statement-of-the-esc-council-on-hypertension-on-ace-inhibitors-and-ang](https://www.escardio.org/Councils/Council-on-Hypertension-(CHT)/News/position-statement-of-the-esc-council-on-hypertension-on-ace-inhibitors-and-ang). Accessed May 6, 2020]
  22. European Society of Hypertension. Statement on COVID-19 2020. [Available from: <https://www.eshonline.org/spotlights/esh-statement-on-covid-19>. Accessed May 6, 2020]
  23. The Renal Association. UK position statement on COVID-19 and ACE Inhibitor/Angiotensin Receptor Blocker use, 2020. [Available from: <https://renal.org/covid-19/ra-resources-renal-professionals/renal-association-uk-position-statement-covid-19-ace-inhibitorangiotensin-receptor-blocker-use>. Accessed Oct 6, 2020]
  24. Liberati A, Altman DG, Tetzlaff J, Mulrow C, Gøtzsche PC, Ioannidis JPA, Clarke M, Devereaux PJ, Kleijnen J, Moher D. The PRISMA statement for reporting systematic



1  
2  
3 reviews and meta-analyses of studies that evaluate healthcare interventions:  
4 explanation and elaboration. *BMJ* 2009;21(339)  
5  
6  
7

- 8 25. Higgins J, Thomas J, Chandler J, Cumpston M, Li T, Page MJ, Welch VA (editors). Cochrane  
9 Handbook for Systematic Reviews of Interventions version 6.0 (updated July 2019):  
10 Cochrane, 2019.  
11  
12  
13  
14  
15 26. Higgins JP, Altman DG, Gotzsche P, Jüni P, Moher D, Oxman AD, Savovic J, Schulz KF, Weeks  
16 L, Sterne JA; Cochrane Bias Methods Group; Cochrane Statistical Methods Group. The  
17 cochrane collaboration's tool for assessing risk of bias in randomised trials. *BMJ*  
18 2011;343:1–9.  
19  
20  
21  
22  
23  
24  
25 27. Higgins JPT, Thompson SG. Quantifying heterogeneity in a meta-analysis. *Stat Med*  
26 2002;21(11):1539–58.  
27  
28  
29  
30 28. Hedges LV, Vevea JL. Fixed- and random-effects models in meta-analysis. *Psychol Methods*  
31 1998;3(4):486–504.  
32  
33  
34  
35 29. Egger M, Davey Smith G, Schneider M, Minder C. Bias in meta-analysis detected by a  
36 simple, graphical test. *BMJ* 1997;315(7109):629–34.  
37  
38  
39  
40  
41  
42  
43  
44  
45  
46  
47  
48  
49  
50  
51  
52  
53  
54  
55  
56  
57  
58  
59  
60

1  
2  
3 **Authors' Contributions:** SG, AR and AES were involved in the planning and writing of this  
4  
5 protocol. CB, DB, FC, NRP, MS, UMS, GSS, MT, TU, RDW and BW reviewed the protocol  
6  
7 and provided intellectual input.  
8  
9

10  
11  
12  
13 **Funding Statement:** This research received no specific grant from any funding agency in the  
14  
15 public, commercial or not-for-profit sectors.  
16  
17

18  
19  
20 **Competing Interests Statement:** Nil competing interests.  
21  
22

23  
24  
25 **Acknowledgements:** Stella Galanis, NSW Health librarian  
26  
27  
28  
29  
30  
31  
32  
33  
34  
35  
36  
37  
38  
39  
40  
41  
42  
43  
44  
45  
46  
47  
48  
49  
50  
51  
52  
53  
54  
55  
56  
57  
58  
59  
60

1  
2  
3 **Figure 1: Flowchart of Trial Inclusion**  
4  
5  
6  
7  
8  
9  
10  
11  
12  
13  
14  
15  
16  
17  
18  
19  
20  
21  
22  
23  
24  
25  
26  
27  
28  
29  
30  
31  
32  
33  
34  
35  
36  
37  
38  
39  
40  
41  
42  
43  
44  
45  
46  
47  
48  
49  
50  
51  
52  
53  
54  
55  
56  
57  
58  
59  
60

For peer review only

**Table 1: Outcome Grouped Tabular Data**

|                                                 | <b>NO ACEi/ARB</b> | <b>ACEi/ARB</b> |
|-------------------------------------------------|--------------------|-----------------|
| <b>BASELINE CHARACTERISTICS</b>                 |                    |                 |
| N                                               |                    |                 |
| Mean Age $\pm$ SD (years)                       |                    |                 |
| Sex, n                                          |                    |                 |
| Men                                             |                    |                 |
| Women                                           |                    |                 |
| Past Medical History, n                         |                    |                 |
| Hypertension                                    |                    |                 |
| Diabetes                                        |                    |                 |
| Chronic Kidney Disease                          |                    |                 |
| Cardiovascular disease                          |                    |                 |
| Chronic obstructive pulmonary disease           |                    |                 |
| Smoking                                         |                    |                 |
| Ever-smoked                                     |                    |                 |
| Non-smoker                                      |                    |                 |
| <b>OUTCOMES FOR <math>\leq 30</math> DAYS</b>   |                    |                 |
| <b>Total number of patients in the group, n</b> |                    |                 |
| All-cause mortality                             |                    |                 |
| Myocardial Infarction                           |                    |                 |
| Congestive Cardiac Failure                      |                    |                 |
| Revascularisation                               |                    |                 |
| Admission to Intensive Care Unit                |                    |                 |
| Need for Mechanical ventilation                 |                    |                 |
| Hospitalisation (if outpatient study)           |                    |                 |
| Pulmonary embolism/deep vein thrombosis         |                    |                 |
| Acute kidney injury                             |                    |                 |
| <b>OUTCOMES <math>&gt;1</math> MONTH, n</b>     |                    |                 |
| All-cause mortality                             |                    |                 |

\*N=number, SD standard deviation, ACEi angiotensin-converting enzyme inhibitors, ARB angiotensin II receptor blocker; acute kidney injury: decline in kidney function or urine output from baseline.

**Table 2: Potential Eligible Randomised Controlled Trials of Adults with COVID-19**

| COUNTRY                                                              | CLINICAL TRIALS.GOV NUMBER | TREATMENT GROUP        | COMPARISON GROUP                  | SAMPLE SIZE | FOLLOW UP |
|----------------------------------------------------------------------|----------------------------|------------------------|-----------------------------------|-------------|-----------|
| Pennsylvania, USA                                                    | NCT04338009                | Continue ACEi/ARB      | Discontinue ACEi/ARB              | 152         | 28 days   |
| Paris, France                                                        | NCT04329195                | Continue ACEi/ARB      | Discontinue ACEi/ARB              | 554         | 28 days   |
| São Paulo, Brazil                                                    | NCT04364893                | Continue ACEi/ARB      | Discontinue ACEi/ARB              | 500         | 30 days   |
| Copenhagen, Denmark                                                  | NCT04351581                | Continue ACEi/ARB      | Discontinue ACEi/ARB              | 215         | 30 days   |
| Munich, Germany; Innsbruck, Austria                                  | NCT04353596                | Continue ACEi/ARB      | Discontinue ACEi/ARB              | 208         | 30 days   |
| São Paulo, Brazil                                                    | NCT04493359                | Continue ACEi/ARB      | Discontinue ACEi/ARB              | 240         | 30 days   |
| Tanta, Egypt                                                         | NCT04345406                | Captopril or enalapril | Placebo                           | 60          | 6 months  |
| Vienna and Innsbruck, Austria                                        | NCT04351724                | Candesartan            | Non-RAS blockade/standard of care | 500*        | 29 days   |
| Minnesota, USA                                                       | NCT04312009                | Losartan               | Placebo                           | 200         | 90 days   |
| Minnesota, USA                                                       | NCT04311177                | Losartan               | Placebo                           | 580         | 28 days   |
| California, USA                                                      | NCT04340557                | Losartan               | Standard care                     | 200         | 45 days   |
| New York, USA                                                        | NCT04328012                | Losartan               | Placebo                           | 4000*       | 60 days   |
| 's-Hertogenbosch, Arnhem, Nijmegen, Roermond, Rotterdam, Netherlands | NCT04335786                | Valsartan              | Placebo                           | 651         | 90 days   |
| San Diego, USA                                                       | NCT04366050                | Ramipril               | Placebo                           | 560         | 14 days   |
| Buenos Aires, Argentina                                              | NCT04355936                | Telmisartan            | Standard care                     | 400         | 90 days   |
| Sydney, Australia                                                    | NCT04394117                | ARB                    | Standard care                     | 605         | 90 days   |
| Oyo, Nigeria; Rawalpindi, Pakistan                                   | NCT04343001                | Losartan               | Standard care                     | 10,000*     | 28 days   |
| Hawaii, USA                                                          | NCT04360551                | Telmisartan            | Placebo                           | 40          | 21 days   |
| Bordeaux, France                                                     | NCT04356495                | Telmisartan            | Control (vitamins)                | 1057*       | 28 days   |
| Strasbourg, France                                                   | NCT04359953                | Telmisartan            | Standard care                     | 1600*       | 28 days   |
| Zumpango, Estado De Mexico, Mexico                                   | NCT04510662                | Telmisartan            | Standard care                     | 60          | 30 days   |

\* Sample size consists of multiple trial arms including non-ACEi/ARB therapies or non-control groups

RAS, renin-angiotensin system; ACEi, angiotensin-converting enzyme inhibitors; ARB, angiotensin II receptor blockers

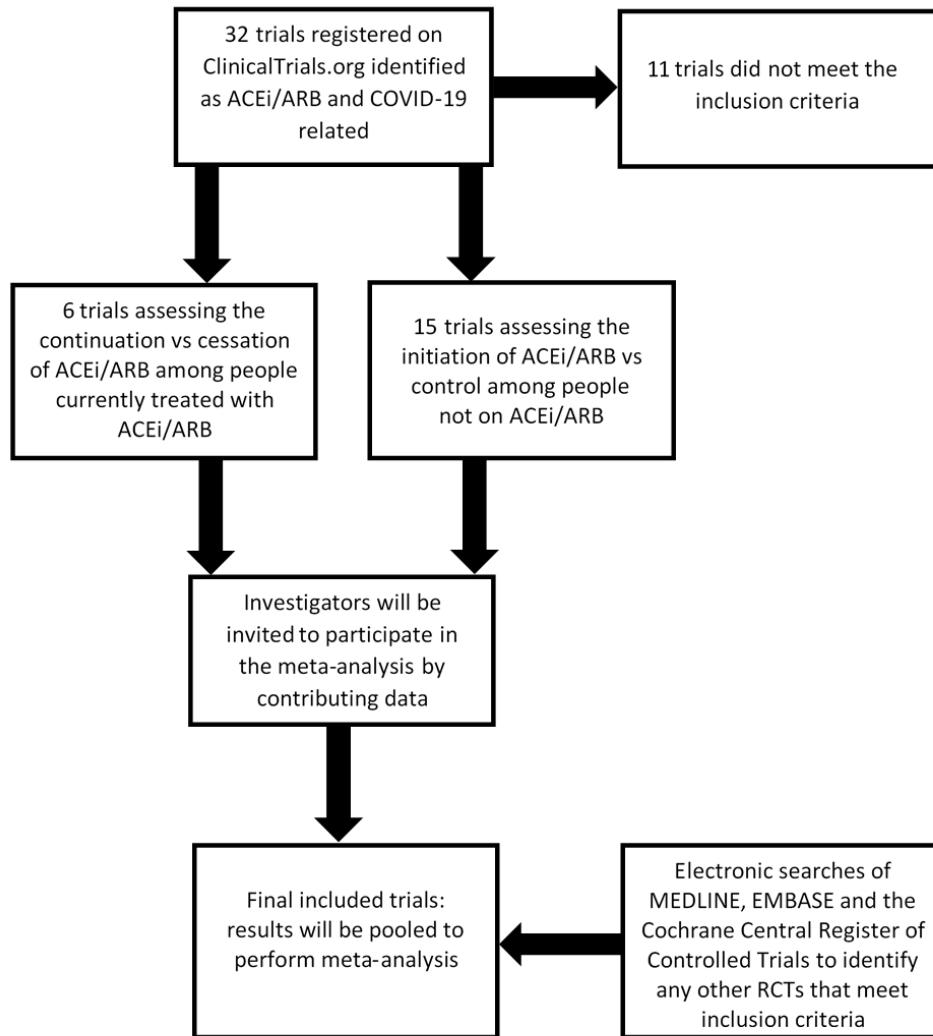

Figure 1: Flowchart of Trial Inclusion

173x188mm (144 x 144 DPI)

1  
2  
3 **A Prospective Meta-Analysis Protocol on Randomised Trials of Renin-Angiotensin-**  
4  
5  
6 **System Inhibitors in Patients with Coronavirus Disease-2019 (COVID-19):**  
7  
8 **An initiative of the International Society of Hypertension.**  
9

10  
11  
12  
13 **Supplemental Data**  
14

15  
16 Sonali R Gnanenthiran<sup>1</sup>, Claudio Borghi<sup>2</sup>, Dylan Burger<sup>3</sup>, Fadi Charchar<sup>4</sup>, Neil R Poulter<sup>5</sup>,  
17  
18 Markus Schlaich<sup>6</sup>, Ulrike Muscha Steckelings<sup>7</sup>, George S Stergiou<sup>8</sup>, Maciej Tomaszewski<sup>9</sup>,  
19  
20 Thomas Unger<sup>10</sup>, Richard D Wainford<sup>11</sup>, Bryan Williams<sup>12</sup>, Anthony Rodgers<sup>1</sup>, Aletta E Schutte<sup>1</sup>  
21

- 22  
23  
24 1. The George Institute for Global Health, University of New South Wales, Sydney, NSW,  
25 Australia  
26  
27 2. Department of Medical and Surgical Sciences, University of Bologna, Bologna, Italy  
28  
29 3. Kidney Research Centre, Ottawa Hospital Research Institute, Department of Cellular and  
30 Molecular Medicine, University of Ottawa, Ottawa, Canada  
31  
32 4. School of Health and Life Sciences, Federation University Australia, Ballarat, Victoria,  
33 Australia  
34  
35 5. Imperial Clinical Trials Unit, Imperial College London, United Kingdom  
36  
37 6. Dobney Hypertension Centre, School of Medicine, Royal Perth Hospital Unit, University  
38 of Western Australia, Perth, Australia  
39  
40 7. Department of Cardiovascular and Renal Research, University of Southern Denmark,  
41 Odense, Denmark  
42  
43 8. Hypertension Center STRIDE-7, School of Medicine, Third Department of Medicine,  
44 Sotiria Hospital, National and Kapodistrian University of Athens, Athens, Greece  
45  
46 9. Division of Medicine and Manchester Academic Health Science Centre, Manchester  
47 University NHS Foundation Trust Manchester, United Kingdom  
48  
49 10. CARIM – School for Cardiovascular Diseases, Maastricht University, Maastricht, the  
50 Netherlands  
51  
52 11. Department of Pharmacology and Experimental Therapeutics and the Whitaker  
53 Cardiovascular Institute, Boston University School of Medicine, Massachusetts, USA.  
54  
55 12. Institute of Cardiovascular Science, University College London and National Institute for  
56 Health Research (NIHR) University College London Hospitals Biomedical Research Centre,  
57 London, United Kingdom.  
58  
59  
60

Supplemental Table 1: Search Strategy

| MEDLINE                                                                                                                                                                                                                                                                                                                                                                                                                                                                                                                                                                                                                   | EMBASE®                                                                                                                                                                                                                                                                                                                                                                                                                                                                                                                                                                                                                                                                                                                                                                                                                                            | Cochrane Central Register of Controlled Trials                                                                                                                                                                                                                                                                                                                                                                     |
|---------------------------------------------------------------------------------------------------------------------------------------------------------------------------------------------------------------------------------------------------------------------------------------------------------------------------------------------------------------------------------------------------------------------------------------------------------------------------------------------------------------------------------------------------------------------------------------------------------------------------|----------------------------------------------------------------------------------------------------------------------------------------------------------------------------------------------------------------------------------------------------------------------------------------------------------------------------------------------------------------------------------------------------------------------------------------------------------------------------------------------------------------------------------------------------------------------------------------------------------------------------------------------------------------------------------------------------------------------------------------------------------------------------------------------------------------------------------------------------|--------------------------------------------------------------------------------------------------------------------------------------------------------------------------------------------------------------------------------------------------------------------------------------------------------------------------------------------------------------------------------------------------------------------|
| 1. exp angiotensin receptor antagonist/<br>2. "angiotensin converting enzyme inhibitor*".mp.<br>3. "angiotensin II receptor blocker*".mp.<br>4. "ACEi".ti,ab,kw.<br>5. "ARB".ti,ab,kw.<br>6. 1 or 2 or 3 or 4 or 5<br>7. "COVID-19".mp.<br>8. "coronavirus-19".mp.<br>9. "severe acute respiratory syndrome coronavirus 2".mp.<br>10. "2019-nCoV".mp.<br>11. "SARS-CoV-2".mp.<br>12. "COV-2".mp.<br>13. "SARS coronavirus".mp.<br>14. 12 and 13<br>15. 7 or 8 or 9 or 10 or 11 or 14<br>16. 6 and 15<br>17. "randomized controlled trial"/<br>18. "randomized controlled trial (topic)"/<br>19. 17 or 18<br>20. 16 and 19 | 1. exp angiotensin receptor antagonist/ (91561)<br>2. "angiotensin converting enzyme inhibitor*".mp. (22027)<br>3. "angiotensin II receptor blocker*".mp. (5419)<br>4. "ACEi".ti,ab,kw. (8009)<br>5. "ARB".ti,ab,kw. (10521)<br>6. 1 or 2 or 3 or 4 or 5 (109156)<br>7. "COVID-19".mp. (49866)<br>8. "coronavirus-19".mp. (109)<br>9. "severe acute respiratory syndrome coronavirus 2".mp. (16979)<br>10. "2019-nCoV".mp. (1158)<br>11. "SARS-CoV-2".mp. (16860)<br>12. "COV-2".mp. (16934)<br>13. "SARS coronavirus".mp. (6360)<br>14. 12 and 13 (1045)<br>15. 7 or 8 or 9 or 10 or 11 or 14 (54626)<br>16. 6 and 15 (737)<br>17. "randomized controlled trial"/ (578979)<br>18. "randomized controlled trial (topic)"/ (187582)<br>19. 17 or 18 (762956)<br>20. 16 and 19 (30)<br>21. (randomi?ed and trial).mp. (928533)<br>22. 20 and 21 (30) | 1. covid-19 OR coronavirus 19 OR coronavirus disease : in Title, Abstract<br>2. angiotensin receptor antagonist OR angiotensin converting enzyme inhibitor OR angiotensin II receptor blockers OR ACEi OR ARB : in Title, Abstract, Keyword<br>3. 1 AND 2<br>4. COVID in All Text<br>5. 3 AND 4<br>6. randomized control* trial* or RCT or OR "controlled clinical trial" OR clinical trial as topic<br>7. 5 AND 6 |



**Supplemental Table 2. Subgroup Analysis for All-Cause Mortality at Short Term Follow up (≤30 days)**

|                           | NO ACEi/ARB group |                       | ACEi/ARB group |                       |
|---------------------------|-------------------|-----------------------|----------------|-----------------------|
|                           | No. of Deaths     | Total no. in subgroup | No. of Deaths  | Total no. in subgroup |
| Sex                       |                   |                       |                |                       |
| Men                       |                   |                       |                |                       |
| Women                     |                   |                       |                |                       |
| Age                       |                   |                       |                |                       |
| <60 years                 |                   |                       |                |                       |
| ≥60 years                 |                   |                       |                |                       |
| Ethnicity                 |                   |                       |                |                       |
| White                     |                   |                       |                |                       |
| South-East/East Asian     |                   |                       |                |                       |
| South Asian               |                   |                       |                |                       |
| African                   |                   |                       |                |                       |
| Other                     |                   |                       |                |                       |
| Comorbidities             |                   |                       |                |                       |
| Hypertension              |                   |                       |                |                       |
| No Hypertension           |                   |                       |                |                       |
| Diabetes Mellitus         |                   |                       |                |                       |
| No Diabetes Mellitus      |                   |                       |                |                       |
| Chronic Kidney Disease    |                   |                       |                |                       |
| No Chronic Kidney Disease |                   |                       |                |                       |
| Cardiovascular Disease    |                   |                       |                |                       |
| No Cardiovascular Disease |                   |                       |                |                       |
| COPD                      |                   |                       |                |                       |
| No COPD                   |                   |                       |                |                       |
| Smoking Status            |                   |                       |                |                       |
| Ever Smoked               |                   |                       |                |                       |
| Non-smoker                |                   |                       |                |                       |

\*ACEi angiotensin-converting enzyme inhibitor, ARB angiotensin II receptor blocker, COPD chronic obstructive pulmonary disease

**Supplemental Table 3: Subgroup Analysis for All-Cause Mortality at Longer Term Follow up (>1 month)**

|                           | NO ACEi/ARB group |                       | ACEi/ARB group |                       |
|---------------------------|-------------------|-----------------------|----------------|-----------------------|
|                           | No. of Deaths     | Total no. in subgroup | No. of Deaths  | Total no. in subgroup |
| Sex                       |                   |                       |                |                       |
| Men                       |                   |                       |                |                       |
| Women                     |                   |                       |                |                       |
| Age                       |                   |                       |                |                       |
| <60 years                 |                   |                       |                |                       |
| ≥60 years                 |                   |                       |                |                       |
| Ethnicity                 |                   |                       |                |                       |
| White                     |                   |                       |                |                       |
| South-East/East Asian     |                   |                       |                |                       |
| South Asian               |                   |                       |                |                       |
| African                   |                   |                       |                |                       |
| Other                     |                   |                       |                |                       |
| Comorbidities             |                   |                       |                |                       |
| Hypertension              |                   |                       |                |                       |
| No Hypertension           |                   |                       |                |                       |
| Diabetes Mellitus         |                   |                       |                |                       |
| No Diabetes Mellitus      |                   |                       |                |                       |
| Chronic Kidney Disease    |                   |                       |                |                       |
| No Chronic Kidney Disease |                   |                       |                |                       |
| Cardiovascular Disease    |                   |                       |                |                       |
| No Cardiovascular Disease |                   |                       |                |                       |
| COPD                      |                   |                       |                |                       |
| No COPD                   |                   |                       |                |                       |
| Smoking Status            |                   |                       |                |                       |
| Ever Smoked               |                   |                       |                |                       |
| Non-smoker                |                   |                       |                |                       |

\*ACEi angiotensin-converting enzyme inhibitor, ARB angiotensin II receptor blocker, COPD chronic obstructive pulmonary disease

**PRISMA-P (Preferred Reporting Items for Systematic review and Meta-Analysis Protocols) 2015 checklist: recommended items to address in a systematic review protocol\***

| Section and topic                 | Item No | Checklist item                                                                                                                                                                                                                | Page |
|-----------------------------------|---------|-------------------------------------------------------------------------------------------------------------------------------------------------------------------------------------------------------------------------------|------|
| <b>ADMINISTRATIVE INFORMATION</b> |         |                                                                                                                                                                                                                               |      |
| Title:                            |         |                                                                                                                                                                                                                               |      |
| Identification                    | 1a      | Identify the report as a protocol of a systematic review                                                                                                                                                                      | 1    |
| Update                            | 1b      | If the protocol is for an update of a previous systematic review, identify as such                                                                                                                                            |      |
| Registration                      | 2       | If registered, provide the name of the registry (such as PROSPERO) and registration number                                                                                                                                    | N/A  |
| Authors:                          |         |                                                                                                                                                                                                                               |      |
| Contact                           | 3a      | Provide name, institutional affiliation, e-mail address of all protocol authors; provide physical mailing address of corresponding author                                                                                     | 1    |
| Contributions                     | 3b      | Describe contributions of protocol authors and identify the guarantor of the review                                                                                                                                           | 16   |
| Amendments                        | 4       | If the protocol represents an amendment of a previously completed or published protocol, identify as such and list changes; otherwise, state plan for documenting important protocol amendments                               | N/A  |
| Support:                          |         |                                                                                                                                                                                                                               |      |
| Sources                           | 5a      | Indicate sources of financial or other support for the review                                                                                                                                                                 | 16   |
| Sponsor                           | 5b      | Provide name for the review funder and/or sponsor                                                                                                                                                                             | N/A  |
| Role of sponsor or funder         | 5c      | Describe roles of funder(s), sponsor(s), and/or institution(s), if any, in developing the protocol                                                                                                                            | N/A  |
| <b>INTRODUCTION</b>               |         |                                                                                                                                                                                                                               |      |
| Rationale                         | 6       | Describe the rationale for the review in the context of what is already known                                                                                                                                                 | 5-6  |
| Objectives                        | 7       | Provide an explicit statement of the question(s) the review will address with reference to participants, interventions, comparators, and outcomes (PICO)                                                                      | 6-7  |
| <b>METHODS</b>                    |         |                                                                                                                                                                                                                               |      |
| Eligibility criteria              | 8       | Specify the study characteristics (such as PICO, study design, setting, time frame) and report characteristics (such as years considered, language, publication status) to be used as criteria for eligibility for the review | 7    |
| Information sources               | 9       | Describe all intended information sources (such as electronic databases, contact with study authors, trial registers or other grey literature sources) with planned dates of coverage                                         | 9-10 |
| Search strategy                   | 10      | Present draft of search strategy to be used for at least one electronic database, including planned limits, such that it could be repeated                                                                                    | 9-10 |

|                                    |     |                                                                                                                                                                                                                                                  |       |
|------------------------------------|-----|--------------------------------------------------------------------------------------------------------------------------------------------------------------------------------------------------------------------------------------------------|-------|
| Study records:                     |     |                                                                                                                                                                                                                                                  |       |
| Data management                    | 11a | Describe the mechanism(s) that will be used to manage records and data throughout the review                                                                                                                                                     | 10-11 |
| Selection process                  | 11b | State the process that will be used for selecting studies (such as two independent reviewers) through each phase of the review (that is, screening, eligibility and inclusion in meta-analysis)                                                  | 10    |
| Data collection process            | 11c | Describe planned method of extracting data from reports (such as piloting forms, done independently, in duplicate), any processes for obtaining and confirming data from investigators                                                           | 9-10  |
| Data items                         | 12  | List and define all variables for which data will be sought (such as PICO items, funding sources), any pre-planned data assumptions and simplifications                                                                                          | 8     |
| Outcomes and prioritization        | 13  | List and define all outcomes for which data will be sought, including prioritization of main and additional outcomes, with rationale                                                                                                             | 8     |
| Risk of bias in individual studies | 14  | Describe anticipated methods for assessing risk of bias of individual studies, including whether this will be done at the outcome or study level, or both; state how this information will be used in data synthesis                             | 10    |
| Data synthesis                     | 15a | Describe criteria under which study data will be quantitatively synthesised                                                                                                                                                                      | 10-11 |
|                                    | 15b | If data are appropriate for quantitative synthesis, describe planned summary measures, methods of handling data and methods of combining data from studies, including any planned exploration of consistency (such as $I^2$ , Kendall's $\tau$ ) | 10-11 |
|                                    | 15c | Describe any proposed additional analyses (such as sensitivity or subgroup analyses, meta-regression)                                                                                                                                            | 8     |
|                                    | 15d | If quantitative synthesis is not appropriate, describe the type of summary planned                                                                                                                                                               | N/A   |
| Meta-bias(es)                      | 16  | Specify any planned assessment of meta-bias(es) (such as publication bias across studies, selective reporting within studies)                                                                                                                    | 10-11 |
| Confidence in cumulative evidence  | 17  | Describe how the strength of the body of evidence will be assessed (such as GRADE)                                                                                                                                                               | 10-11 |

**\* It is strongly recommended that this checklist be read in conjunction with the PRISMA-P Explanation and Elaboration (cite when available) for important clarification on the items. Amendments to a review protocol should be tracked and dated. The copyright for PRISMA-P (including checklist) is held by the PRISMA-P Group and is distributed under a Creative Commons Attribution Licence 4.0.**

*From: Shamseer L, Moher D, Clarke M, Ghersi D, Liberati A, Petticrew M, Shekelle P, Stewart L, PRISMA-P Group. Preferred reporting items for systematic review and meta-analysis protocols (PRISMA-P) 2015: elaboration and explanation. BMJ. 2015 Jan 2;349(jan02 1):g7647.*
