# Supplementary material for: Prospective meta-analysis protocol on randomised trials of renin–angiotensin system inhibitors in patients with COVID-19: an initiative of the International Society of Hypertension
Source: PubMed Central journal article supplement — BMJ Open. 2021 Feb 16;11(2):e043625. doi: 10.1136/bmjopen-2020-043625 (PMC7887864; doi:10.1136/bmjopen-2020-043625), 2021-02-16
Supplement: bmjopen-2020-043625supp001.pdf [file bmjopen-2020-043625supp001.pdf]

**Supplemental Table 1: Search Strategy**

| MEDLINE                                                  | EMBASE®                                                          | Cochrane Central Register of Controlled Trials                                                                                                                 |
|----------------------------------------------------------|------------------------------------------------------------------|----------------------------------------------------------------------------------------------------------------------------------------------------------------|
| 1. exp angiotensin receptor antagonist/                  | 1. exp angiotensin receptor antagonist/ (91561)                  | 1. covid-19 OR coronavirus 19 OR coronavirus disease : in Title, Abstract                                                                                      |
| 2. "angiotensin converting enzyme inhibitor*".mp.        | 2. "angiotensin converting enzyme inhibitor*".mp. (22027)        | 2. angiotensin receptor antagonist OR angiotensin converting enzyme inhibitor OR angiotensin II receptor blockers OR ACEi OR ARB : in Title, Abstract, Keyword |
| 3. "angiotensin II receptor blocker*".mp.                | 3. "angiotensin II receptor blocker*".mp. (5419)                 | 3. 1 AND 2                                                                                                                                                     |
| 4. "ACEi".ti,ab,kw.                                      | 4. "ACEi".ti,ab,kw. (8009)                                       | 4. COVID in All Text                                                                                                                                           |
| 5. "ARB".ti,ab,kw.                                       | 5. "ARB".ti,ab,kw. (10521)                                       | 5. 3 AND 4                                                                                                                                                     |
| 6. 1 or 2 or 3 or 4 or 5                                 | 6. 1 or 2 or 3 or 4 or 5 (109156)                                | 6. randomized control* trial* or RCT or OR "controlled clinical trial" OR clinical trial as topic                                                              |
| 7. "COVID-19".mp.                                        | 7. "COVID-19".mp. (49866)                                        | 7. 5 AND 6                                                                                                                                                     |
| 8. "coronavirus-19".mp.                                  | 8. "coronavirus-19".mp. (109)                                    |                                                                                                                                                                |
| 9. "severe acute respiratory syndrome coronavirus 2".mp. | 9. "severe acute respiratory syndrome coronavirus 2".mp. (16979) |                                                                                                                                                                |
| 10. "2019-nCoV".mp.                                      | 10. "2019-nCoV".mp. (1158)                                       |                                                                                                                                                                |
| 11. "SARS-CoV-2".mp.                                     | 11. "SARS-CoV-2".mp. (16860)                                     |                                                                                                                                                                |
| 12. "COV-2".mp.                                          | 12. "COV-2".mp. (16934)                                          |                                                                                                                                                                |
| 13. "SARS coronavirus".mp.                               | 13. "SARS coronavirus".mp. (6360)                                |                                                                                                                                                                |
| 14. 12 and 13                                            | 14. 12 and 13 (1045)                                             |                                                                                                                                                                |
| 15. 7 or 8 or 9 or 10 or 11 or 14                        | 15. 7 or 8 or 9 or 10 or 11 or 14 (54626)                        |                                                                                                                                                                |
| 16. 6 and 15                                             | 16. 6 and 15 (737)                                               |                                                                                                                                                                |
| 17. "randomized controlled trial"/                       | 17. "randomized controlled trial"/ (578979)                      |                                                                                                                                                                |
| 18. "randomized controlled trial (topic)"/               | 18. "randomized controlled trial (topic)"/ (187582)              |                                                                                                                                                                |
| 19. 17 or 18                                             | 19. 17 or 18 (762956)                                            |                                                                                                                                                                |
| 20. 16 and 19                                            | 20. 16 and 19 (30)                                               |                                                                                                                                                                |
|                                                          | 21. (randomi?ed and trial).mp. (928533)                          |                                                                                                                                                                |
|                                                          | 22. 20 and 21 (30)                                               |                                                                                                                                                                |
