# Supplementary material for: Prospective meta-analysis protocol on randomised trials of renin–angiotensin system inhibitors in patients with COVID-19: an initiative of the International Society of Hypertension
Source: PubMed Central journal article supplement — BMJ Open. 2021 Feb 16;11(2):e043625. doi: 10.1136/bmjopen-2020-043625 (PMC7887864; doi:10.1136/bmjopen-2020-043625), 2021-02-16
Supplement: bmjopen-2020-043625supp002.pdf [file bmjopen-2020-043625supp002.pdf]

**Supplemental Table 2. Subgroup Analysis for All-Cause Mortality at Short Term Follow up (≤30 days)**

|                           | NO ACEi/ARB group |                       | ACEi/ARB group |                       |
|---------------------------|-------------------|-----------------------|----------------|-----------------------|
|                           | No. of Deaths     | Total no. in subgroup | No. of Deaths  | Total no. in subgroup |
| Sex                       |                   |                       |                |                       |
| Men                       |                   |                       |                |                       |
| Women                     |                   |                       |                |                       |
| Age                       |                   |                       |                |                       |
| <60 years                 |                   |                       |                |                       |
| ≥60 years                 |                   |                       |                |                       |
| Ethnicity                 |                   |                       |                |                       |
| White                     |                   |                       |                |                       |
| South-East/East Asian     |                   |                       |                |                       |
| South Asian               |                   |                       |                |                       |
| African                   |                   |                       |                |                       |
| Other                     |                   |                       |                |                       |
| Comorbidities             |                   |                       |                |                       |
| Hypertension              |                   |                       |                |                       |
| No Hypertension           |                   |                       |                |                       |
| Diabetes Mellitus         |                   |                       |                |                       |
| No Diabetes Mellitus      |                   |                       |                |                       |
| Chronic Kidney Disease    |                   |                       |                |                       |
| No Chronic Kidney Disease |                   |                       |                |                       |
| Cardiovascular Disease    |                   |                       |                |                       |
| No Cardiovascular Disease |                   |                       |                |                       |
| COPD                      |                   |                       |                |                       |
| No COPD                   |                   |                       |                |                       |
| Smoking Status            |                   |                       |                |                       |
| Ever Smoked               |                   |                       |                |                       |
| Non-smoker                |                   |                       |                |                       |

\*ACEi angiotensin-converting enzyme inhibitor, ARB angiotensin II receptor blocker, COPD chronic obstructive pulmonary disease
